# Sustained IL-15 response signature predicts RhCMV/SIV vaccine efficacy

Short title: IL-15 and RhCMV/SIV vaccine response

## Authors

Fredrik Barrenäs<sup>1</sup>, Scott G. Hansen<sup>2</sup>, Lynn Law<sup>3</sup>, Connor Driscoll<sup>3</sup>, Richard R. Green<sup>3</sup>, Elise Smith<sup>3</sup>, Jean Chang<sup>3</sup>, Inah Golez<sup>3</sup>, Taryn Urion<sup>3</sup>, Xinxia Peng<sup>4</sup>, Leanne Whitmore<sup>3</sup>, Daniel Newhouse<sup>3</sup>, Colette M. Hughes<sup>2</sup>, David Morrow<sup>2</sup>, Kurt T. Randall<sup>2</sup>, Andrea N. Selseth<sup>2</sup>, Julia C. Ford<sup>2</sup>, Roxanne M. Gilbride<sup>2</sup>, Bryan E. Randall<sup>2</sup>, Emily Ainslie<sup>2</sup>, Kelli Oswald<sup>5</sup>, Rebecca Shoemaker<sup>5</sup>, Randy Fast<sup>5</sup>, William J. Bosche<sup>5</sup>, Michael K. Axthelm<sup>2</sup>, Yoshinori Fukazawa<sup>2</sup>, George N. Pavlakis<sup>6</sup>, Barbara K. Felber<sup>7</sup>, Slim Fourati<sup>8</sup>, Rafick-Pierre Sekaly<sup>8</sup>, Jeffrey D. Lifson<sup>5</sup>, Jan Komorowski<sup>1</sup>, Ewelina Kosmider<sup>9</sup>, Jason Shao<sup>9</sup>, Wenjun Song<sup>9</sup>, Paul T. Edlefsen<sup>9</sup>, Louis J. Picker<sup>2\*</sup>, Michael Gale, Jr.<sup>3\*</sup>

## Affiliations

<sup>1</sup>Department of Cell and Molecular Biology, Uppsala University, Uppsala, Sweden.

<sup>2</sup>Vaccine and Gene Therapy Institute and Oregon National Primate Research Center, Oregon Health & Science University, Beaverton, OR, USA.

<sup>3</sup>Center for Innate Immunity and Immune Disease, Department of Immunology, University of Washington, Seattle, WA, USA.

<sup>4</sup>Department of Molecular Biomedical Sciences and Bioinformatics Research Center, North Carolina State University, Raleigh, NC, USA.

<sup>5</sup>AIDS and Cancer Virus Program, SAIC Frederick, Inc., Frederick National Laboratory, Leidos Biomedical Research, Inc., Frederick, MD, USA.

<sup>6</sup>Human Retrovirus Section, Vaccine Branch, National Cancer Institute at Frederick, Frederick, Maryland, USA.

23 <sup>7</sup>Human Retrovirus Pathogenesis Section, Vaccine Branch, National Cancer Institute at Frederick,  
24 Frederick, Maryland, USA.

25 <sup>8</sup>Department of Pathology, Case Western Reserve University, Cleveland, OH, USA.

26 <sup>9</sup>Statistical Center for HIV/AIDS Research and Prevention, Vaccine and Infectious Disease Division,  
27 Fred Hutchinson Cancer Research Center, Seattle, WA, USA.

28 \*To whom correspondence should be addressed: Michael Gale, Jr., [mgale@uw.edu](mailto:mgale@uw.edu); Louis J. Picker,  
29 [pickerl@ohsu.edu](mailto:pickerl@ohsu.edu)

30 **Abstract**

31 Simian immunodeficiency virus (SIV) challenge of rhesus macaques (RMs) vaccinated with Rhesus  
32 Cytomegalovirus (RhCMV) vectors expressing SIV proteins (RhCMV/SIV) results in a binary outcome:  
33 stringent control and subsequent clearance of highly pathogenic SIV in ~55% of vaccinated RMs with  
34 no protection in the remaining 45%. Although previous work suggests that unconventionally restricted,  
35 SIV-specific, effector-memory (EM)-biased CD8<sup>+</sup> T cell responses are necessary for efficacy, the  
36 magnitude of these responses does not predict efficacy, and the basis of protection vs. non-protection in  
37 RhCMV/SIV vector-vaccinated RMs has not been elucidated. Here, we report that RhCMV/SIV vector  
38 administration strikingly alters the whole blood transcriptome of vaccinated RMs, with the sustained  
39 induction of specific immune-related pathways, including non-canonical T cell receptor (TCR), toll-like  
40 receptor (TLR), inflammasome/cell death, and interleukin-15 (IL-15) signaling, significantly predicting  
41 protection. The IL-15 gene expression signature was further evaluated in an independent RM IL-15  
42 treatment cohort, revealing that in whole blood the response to IL-15 is inclusive of innate and adaptive  
43 immune gene expression networks that link with RhCMV/SIV vaccine efficacy. We also show that this  
44 IL-15 response signature similarly tracks with vaccine protection in an independent RhCMV/SIV  
45 vaccination/SIV challenge RM validation cohort. Thus, the RhCMV/SIV vaccine imparts a coordinated  
46 and persistent induction of innate and adaptive immune pathways featuring IL-15, a known regulator of  
47 CD8<sup>+</sup> T cell function, that enable vaccine-elicited CD8<sup>+</sup> T cells to mediate protection against highly  
48 pathogenic SIV challenge. **(231 words)**

49 **Author Summary**

50 SIV insert-expressing vaccine vectors based on strain 68-1 RhCMV elicit robust, highly effector-  
51 memory-biased T cell responses that are associated with an unprecedented level of SIV control after  
52 challenge (replication arrest leading to clearance) in slightly over half of vaccinated monkeys. Since  
53 efficacy is not predicted by standard measures of immunogenicity, we used functional genomics analysis

54 of RhCMV/SIV vaccinated monkeys with known challenge outcomes to identify immune correlates of  
55 protection. We found that arrest of viral replication after challenge significantly correlates with a  
56 vaccine-induced response to IL-15 that includes modulation of T cell, inflammation, TLR signaling, and  
57 cell death programming. These data suggest that RhCMV/SIV efficacy is not based on chance, but rather,  
58 results from a coordinated and sustained vaccine-mediated induction of innate and adaptive immune  
59 pathways featuring IL-15, a known regulator of CD8<sup>+</sup> effector-memory T cell function, that enable  
60 vaccine-elicited CD8<sup>+</sup> T cells to mediate efficacy. (146 words)

## 61 **Introduction**

62 Human immunodeficiency virus (HIV) infection continues to be a major global health problem, with  
63 approximately 38 million people worldwide currently living with HIV. Despite the decline in new  
64 infections and the remarkable success of current antiretroviral therapy (ART) at suppressing viral load  
65 in people undergoing treatment, there were 1.7 million new HIV infections in 2019 and nearly 700,000  
66 AIDS-related deaths (1). Thus, the need for a vaccine to protect against HIV infection remains high,  
67 underscoring the continued essential role of RM models of SIV infection for developing and testing HIV  
68 vaccine concepts. In this regard, the highly pathogenic SIVmac251 swarm and SIVmac239 clones have  
69 been especially high bars for prophylactic vaccine efficacy with few concepts reproducibly showing  
70 sufficient efficacy against these highly pathogenic SIVs for clinical translation (2-4).

71 Among these is the T cell response-targeted SIV vaccine that uses vaccine vectors based on RhCMV,  
72 which elicit and indefinitely maintain high frequency, circulating and tissue-based, effector memory  
73 (EM)-differentiated SIV-specific T cell responses (2, 5-7). RhCMV vectors were designed to provide  
74 for an immediate effector T cell intercept of immune-evasive pathogens, so as to implement anti-  
75 pathogen immune activity prior to development of effective immune evasion (8). In contrast to  
76 conventional T cell-targeted prime-boost vaccines against SIV, which elicit responses that at best  
77 suppress, but never clear SIV infection, RhCMV/SIV vector-elicited immune responses have the ability

78 to mediate complete arrest of mucosal-acquired SIV infection prior to establishment of a long-lived SIV  
79 reservoir, ultimately resulting in progressive decline of SIV-infected cells in tissues to the point where  
80 replication-competent SIV can no longer be detected by the most sensitive assays (9-11). This  
81 remarkable “control and clear” efficacy is not, however, universal, but rather occurs in ~55% of  
82 vaccinated RM across multiple studies, with the SIV infections in the ~45% of vaccinated, non-protected  
83 RMs showing indistinguishable viral dynamics from the unvaccinated controls (9, 10, 12).

84 Importantly, the RhCMV/SIV vaccine vectors manifesting this efficacy are based on the 68-1 strain of  
85 RhCMV, which developed a unique genetic rearrangement during *in vitro* passage that abrogated the  
86 function of eight distinct immunomodulatory gene products encoded in two RhCMV genomic regions  
87 (Rh157.5/4 and Rh158-161). These gene modifications had the remarkable effect of programming both  
88 the virus- and SIV insert-specific CD8<sup>+</sup> T cells induced by this vector to recognize epitopes restricted by  
89 either MHC-E or MHC-II, but not classical MHC-Ia (13-15). Differential repair of these genes reverts  
90 epitope restriction of vector-elicited CD8<sup>+</sup> T cells to MHC-Ia or MHC-Ia mixed with MHC-II, whereas  
91 another mutation of 68-1 RhCMV (deletion of Rh67) results in exclusively MHC-II-restricted CD8<sup>+</sup> T  
92 cells (15, 16). Although the MHC-Ia- and/or MHC-II-restricted CD8<sup>+</sup> T cell responses elicited by these  
93 other RhCMV/SIV vectors manifest similar phenotypic and functional characteristics, only the original  
94 68-1 vector shows efficacy against SIV (15, 16), strongly implicated the MHC-E-restricted, SIV-specific  
95 CD8<sup>+</sup> T cells as the active adaptive component of this non-antibody-inducing vaccine. However, to date,  
96 no quantitative parameter of the 68-1 RhCMV/SIV-induced T cell responses has consistently correlated  
97 with the binary outcome (protection vs. non-protection) after SIV challenge (9, 10, 12). These  
98 observations raise the question of whether protection mediated by MHC-E-restricted CD8<sup>+</sup> T cells is  
99 stochastic – i.e., based on the chance, relative distribution of infection trajectory vs. effector cell  
100 distribution in an early, critical time window after viral entry – or based on more complex characteristics  
101 of the vaccine-elicited immune response.

102 Here, we performed functional genomics analyses including bioinformatics linear modeling of the RM  
103 whole blood transcriptome before and longitudinally after 68-1 RhCMV/SIV vaccination, asking  
104 whether a vaccine-induced, transcriptomic response could predict RMs that were or were not  
105 subsequently protected after SIV challenge. These analyses revealed a complex transcriptomic response  
106 to vaccination that included modulation of specific immunoregulatory gene pathways linked with IL-15  
107 signaling. Indeed, as assessed the *in vivo* whole blood response to IL-15 to reveal that IL-15 signaling  
108 directs a remarkable breadth of gene expression networks linked with innate and adaptive immune  
109 programming that underlie RhCMV/SIV vaccine efficacy. Our study defines the gene and gene network  
110 correlates mediating vaccine efficacy and protection. These findings that suggest RhCMV/SIV vaccine  
111 protection is not stochastic, but rather is dependent on vaccine-induced specific innate and adaptive  
112 immune responses.

## 113 **Results**

### 114 **Characterization of a RhCMV/SIV vector-vaccinated RM cohort with known challenge outcome**

115 Two cohorts of male RM (n=15 each) were administered a vaccine composed of three 68-1 RhCMV/SIV  
116 vectors individually expressing SIV Gag, SIV Rev/Tat/Nef and SIV 5'-Pol, one group via a subcutaneous  
117 (subQ) route and the other via an oral route. Each RM was vaccinated twice, receiving a week (wk) 0  
118 prime (Pr) and wk18 homologous boost (Bo) (**Fig. 1A**). The development of SIV-specific T cells was  
119 monitored by intracellular cytokine staining (ICS), with immunogenicity in both the subQ and oral  
120 vaccine groups showing robust induction of SIV Gag-, Rev/Tat/Nef-, and Pol-specific CD4<sup>+</sup> and CD8<sup>+</sup>  
121 T cells (**Figs. S1A,B**), including CD8<sup>+</sup> T cell responses to previously characterized MHC-E- and MHC-  
122 II-restricted SIV Gag supertopes – indicating, as expected, the induction of the unconventionally  
123 restricted CD8<sup>+</sup> T cells; **Fig. S1C**) (13, 14). These T cell responses, which were maintained through the  
124 time of challenge, manifested a striking EM bias in phenotype and function, similar to our previous  
125 analysis of T cell responses elicited by these vectors (5, 9, 10, 12) (**Fig. S1D-E**). Of note, there were no

126 significant differences in these immunogenicity parameters in RM given the vaccines via subQ vs. oral  
127 route. At wk91 after initial vaccination, these vaccinated RM (and 15 unvaccinated controls) were  
128 subjected to repeated limiting dose, intrarectal challenge until establishment of infection “take” by  
129 detection of *de novo* T cell responses to SIVvif (an SIV Ag not included in the vaccine; **Fig. 1B**), as  
130 previously described (5, 9, 10, 12). Analysis of plasma viral load in RM with such infection “take”  
131 showed stringent control of viral replication in 8 and 9 of 15 RMs from the subQ and oral groups  
132 (protected RMs), respectively, with no “protected” RMs in the unvaccinated control group (**Fig. 1C**).  
133 Analysis of tissue cell-associated viral load confirmed that protected RMs were indeed infected by SIV  
134 (**Fig. 1D**), demonstrating that the absence of viremia in these RMs reflected immune-mediated arrest of  
135 SIV replication. Pre-specified statistical analyses of the T cell responses measured by ICS across the two  
136 vaccine cohorts found no association between magnitude and phenotype of the SIV-specific responses  
137 and protection from progressive SIV infection across the two vaccinated RM cohorts (**Figs. S2A-E**).

### 138 **Analysis of the whole blood transcriptome induced by subQ and oral RhCMV/SIV vaccination**

139 To determine whether other parameters of the vaccine response might serve to differentially program  
140 protective immunity across the outcome groups, we performed longitudinal global transcriptomic  
141 profiling of mRNA expression in whole blood samples collected prior to Pr and Bo RhCMV/SIV  
142 vaccinations (d0 of wk0 and wk18, respectively], at d1, d3 and d7 following Pr and Bo, and at wk88, 3  
143 wks prior to initiating SIV challenge (see **Fig. 1A**). We first conducted analyses comparing baseline gene  
144 expression profiles across subQ and oral cohorts and found that pre-vaccination signatures of individual  
145 RMs were similar to one another across cohorts (**Figs. 2A, B**). We next evaluated the gene expression  
146 responses to vaccination by performing a principal component analysis (PCA) on the per-timepoint mean  
147 log<sub>2</sub> fold-change (FC) values, using all 12,734 expressed genes and averaged over the RMs within each  
148 treatment and outcome group (**Fig. 2C**). PC1 and PC2 constituted the majority of the post-vaccination  
149 gene expression variability that segregated the animals into protected and non-protected outcome groups.

150 To further evaluate these differences, we defined the set of genes with statistically significant differential  
151 expression (DE) at any post-vaccination time point compared to baseline in any of the four RM  
152 subgroups defined by administration route and protection outcome, using bioinformatics analyses and  
153 linear modeling (**Fig. 2D; Table S1**). These analyses suggested that DE genes associated with variation  
154 in PC1 are relevant for establishing a vaccine protective signature. PC1 DE gene expression changes  
155 occurred rapidly after vaccination (d1 in both cohorts), with highest numbers and absolute levels of gene  
156 expression change from baseline found in the oral cohort 3d after Pr. The expression of these DE genes  
157 was variably reduced thereafter, but were relatively maintained in the protected RMs, with the expression  
158 level change increasing to a greater degree in the protected group following vaccine boost. Importantly,  
159 absolute gene expression changes of the PC1 DE genes persisted through the pre-challenge (PreCh) time  
160 point in the protected RMs, whereas non-protected RMs failed to maintain or re-establish this signature  
161 by the PreCh time point.

### 162 **Gene network correlates of protection**

163 To identify gene expression correlates of protection and their functional regulatory networks, we  
164 determined the DE genes showing significant differential expression between protected and non-  
165 protected groups across the time course, designated as DDE genes. The 2,272 DDE genes identified  
166 (**Table S2**) capture the variable signature between protected and non-protected outcome groups (**Fig.**  
167 **3A**). Using permutation testing we verified that the magnitude of differential expression between  
168 protection outcomes was significant ( $P = 0.011$ ), thus linking DDE gene expression with vaccine  
169 protection. To identify specific response pathways and networks among the DDE genes that define  
170 vaccine protection, we first performed clustering analysis and found four major clusters containing either  
171 mostly induced/up-regulated genes (Clusters 1 and 2) or suppressed/down-regulated genes (Clusters 3  
172 and 4) in the protected RM across both vaccine groups (**Fig. 3A**). The vaccine-induced gene clusters  
173 were associated mainly with innate immune pathways spanning TLR signaling and cytokine response



174 pathways, inflammasome/cell death signaling, and included a set of T cell/TCR signaling genes (**Fig.**  
175 **3B**). Pathway analyses of DDE gene network linkage identified death receptor signaling/inflammasome  
176 network interactions with a TLR network and genes involved in TCR signaling marked through  
177 previously defined interactions of *PPP3CA*/calcineurin and *PTPN11*/SHP1 phosphatases (17-20), and  
178 phosphatidylinositol responsive kinase (PI3K) subunits (*PI3KR1* and *PIK3CB*)(21), each network  
179 significantly associated with vaccine protection (**Fig. 3C**). Notably, genes encoding essential factors of  
180 T helper-1 polarization and immune activation, including the T-bet transcription factor (*TBX21*), IL-2  
181 and IL-12 receptor subunits, and the Zeta associated protein kinase 70 (*ZAP70*)(22-24) were suppressed  
182 or "down-regulated" concomitant with up-regulation of *PTPN11*, *PPP3CA* and indolamine dioxygenase  
183 1 (*IDO1*), genes known to impose an immune regulatory phenotype(25, 26), thus defining a non-  
184 canonical T cell activation/TCR signaling signature in the blood of protected RMs.

185 We also found that JAK-STAT cytokine signaling was enriched within the DDE gene signature in the  
186 absence of typical type I interferon stimulated genes (ISGs), suggesting different interleukin signaling  
187 programs (**Fig. 3D**). We therefore interrogated our gene expression data sets for expression levels of all  
188 interleukins, identifying only IL-7, IL-10, TXLNA/IL-14, IL-15, and IL-23A as being expressed at one  
189 or more time points within the vaccine cohorts. Among these, IL-15 expression was enriched in protected  
190 RMs and was identified as a significant upstream regulator of the vaccine protection-associated DDE  
191 signature (**Fig. 3E**). We found that the increased upregulation of IL-15 expression in protected, compared  
192 to nonprotected, RMs was accompanied by downregulation of IL-15 receptor subunits and their JAK-  
193 STAT signaling components relative to the other interleukins. Downregulation of cytokine receptor  
194 expression is a specific marker of active cytokine signaling (27), suggesting that an active IL-15 cytokine  
195 signaling pathway is a component of the DDE protection signature (see **Fig. 3D**).

196 **Protection signature links with IL-15 signaling**

197 IL-15 plays a major role in cellular immune programming, supporting memory T cell and NK cell  
198 activation, homing, homeostasis, both effector differentiation and function, and in particular controlling  
199 the activity of circulating and tissue resident CD8<sup>+</sup> EM T cells (28-32). IL-15 activates signaling through  
200 the  $\beta$  chain and common  $\gamma$  chain heterodimer of the IL-2 receptor, either as a soluble heterodimer with  
201 the  $\alpha$  chain of the IL-15 receptor (IL-15R $\alpha$ ) or through trans-presentation by cells expressing IL-  
202 15R $\alpha$ (33-35). Mimicking this process, recombinant, purified heterodimeric IL-15/IL-15R $\alpha$  (rRh-Het-  
203 IL-15) is a potent immune therapeutic to induce IL-15 signaling (36-38). To further define the whole  
204 blood gene expression signature directed by IL-15 *in vivo* and to evaluate the breadth of the IL-15  
205 response in 68-1 RhCMV/SIV vaccinated RMs, we conducted transcriptomic analysis on whole blood  
206 samples from a separate cohort of five unvaccinated RM treated with rRh-Het-IL-15 in a dose-escalating  
207 fashion (5, 10, and 15  $\mu$ g/kg at d0, d3 and d7 respectively) with blood collection through d29 (**Fig. 4A**).  
208 We identified DE genes responding to rRh-Het-IL-15 treatment *in vivo* across this 29d time course  
209 (**Table S3**) in which IL-15 rapidly altered gene expression within one day of administration followed by  
210 a homeostatic reset of expression levels two days later (**Fig. 4B, left panels**). We used the d1 post IL-15  
211 administration DE genes to interrogate the DDE signature of the vaccinated RMs for evidence of an  
212 embedded IL-15 response. This d1 DE gene set was selected to reflect the direct response of the RMs to  
213 IL-15 prior to the onset of homeostatic regulation. We identified multiple co-expression clusters within  
214 the intersecting gene set of 256 genes (**Fig. 4B, Table S4**). Pathway analyses of each cluster revealed an  
215 overlap of the response to rRh-Het-IL-15 with several of the immunological pathways identified in the  
216 DDE analysis, including up-regulated pathways (cluster A) of PI3K signaling, NF-kB-driven  
217 inflammatory genes, death receptor signaling, and T cell signaling modules (**Fig. 4C**). These networks  
218 link to interferon regulatory factor (IRF) and STAT transcription factors as major upstream regulators  
219 responding to IL-15 signaling. Moreover, we identified acutely down-regulated IL-15 response genes  
220 that were also components of the DDE protection signature (see **Fig. 4C**, cluster B). Notably, among

221 genes showing acute downregulation by rRh-Het-IL-15 treatment were pathways regulated by  
222 *TBX21*/Tbet, STAT6 and other upstream regulators, consistent with the non-canonical T cell and  
223 cytokine signaling DDE signatures (see **Figs. 3C,D**).

224 To identify interaction between IL-15 regulated genes within the DDE protective signature, we built *de*  
225 *novo* gene interaction networks using GeneMania (39), basing network construction on genes within  
226 each cluster of our intersecting dataset. Among genes up-regulated by rRh-Het-IL-15 treatment within  
227 the DDE vaccine protection signature, we identified multiple pathways involved in immune activation  
228 including TLR signaling, innate immune activation, and death receptor signaling, each linked to specific  
229 transcription factor nodes (IRF1, IRF2, IRF7, STAT1, 3, and 5). As these IRFs and STATs are also  
230 prominent ISGs (40), these results together reveal a remarkable breadth of signaling crosstalk in immune  
231 programming wherein IL-15 signaling intersects both innate and adaptive immune pathways in building  
232 the DDE protection signature, likely reflecting a cascade of direct and indirect IL-15 signaling actions  
233 (**Figs. 4D,E**). Of note, we identified a linkage of the acutely IL-15 down-regulated genes with specific  
234 transcription factors of the non-canonical T cell activation TCR signaling DDE module described above  
235 (**Fig. 4E**). Most importantly, the acute IL-15 response gene set (all IL-15 DE genes at d1) was  
236 significantly linked with vaccine protection, using permutation testing methods similar to how we  
237 evaluated the DDE signature ( $P = 0.002$ ). These analyses identify IL-15 as a major regulator of the DDE  
238 signature underlying RhCMV/SIV vaccination outcome and demonstrate linkage of IL-15 responsive  
239 genes with vaccine efficacy.

#### 240 **Conserved IL-15 response links with vaccine protection in validation cohort analysis**

241 We next evaluated the whole blood gene expression signature in an independent validation cohort of 15  
242 RM that had been subQ vaccinated with a combination vaccine including the same 68-1 RhCMV/SIV  
243 vaccine set used in the RM described above and a variant 68-1.2 RhCMV/SIV vaccine set with the same  
244 SIV inserts (**Table S5**). The 68-1.2 RhCMV/SIV vector is repaired for pentameric complex expression

245 and therefore is programmed to elicit MHC-Ia-restricted CD8<sup>+</sup> T cell responses, resulting in these  
246 vaccinated RM having both conventionally (MHC-Ia) and unconventionally (MHC-E and MHC-II)  
247 restricted SIV-specific CD8<sup>+</sup> T cell responses (15). 68-1.2 RhCMV/SIV vectors are not protective, but  
248 they do not abrogate 68-1 RhCMV/SIV vector-mediated protection, and 6 of the 15 vaccinated RM in  
249 this validation cohort manifested stringent viral control after SIV challenge (15). Although the 68-1+68-  
250 1.2 combination vaccine is quite different than the 68-1-only vaccine, the protection phenotype in RM  
251 (e.g., viral replication-arrest) was identical to our 68-1-only vaccinated cohorts, suggesting that  
252 protection-critical signaling such as the IL-15 pathway described in **Fig. 4**, might be preserved in  
253 protected animals receiving this combination vaccine. The validation 68-1+68-1.2 cohort was studied in  
254 parallel with the subQ and oral, 68-1 vaccinated cohorts, and sample collection, processing and RNAseq  
255 analysis were performed identically. Comparison of the post-vaccination change-from-baseline  
256 expression pattern of the IL-15-regulated genes shown in **Fig. 4B** (intersection of DDE and day 1 rRh-  
257 Het-IL-15 DE) in protected vs. non-protected RM in the validation cohort and the SubQ 68-1 vaccinated  
258 cohort (also n = 15) revealed a very similar pattern with protected RM in both cohorts showing a more  
259 pronounced and durable IL-15 response to vaccination than the non-protected RMs (**Fig. 5A; Tables S4,**  
260 **S6**). In keeping with this outcome, the vaccine response in protected animals in both cohorts showed a  
261 higher correlation with the IL-15 response than in non-protected animals (**Fig. 5B**).

## 262 **Discussion**

263 Our study reveals an IL-15 response gene signature underlying Rh/CMV-SIV vaccine protection in RM.  
264 This signature encompasses functional pathways/modules consisting of non-canonical T cell signaling  
265 (defined in this study), TLR signaling, and inflammasome/cell death signaling that correlate with vaccine  
266 protection. The magnitude and persistence of gene expression changes following vaccination are  
267 significantly greater and sustained throughout the study time course in RM destined for protection after

268 challenge with the IL-15 response signature being a predictor of a vaccine response that links with  
269 protection across vaccination cohorts.

270 IL-15 is produced by myeloid cells, including dendritic cells and monocyte/macrophages, and acts on T  
271 cells and NK cells to activate/enhance effector response and cell homing actions (28-32). Since adaptive  
272 (SIV-specific) cellular immunity is required for RhCMV/SIV-based vaccine efficacy (9), the most likely  
273 targets of this cytokine in our protected RM are the unconventionally MHC-E-restricted SIV-specific  
274 CD8<sup>+</sup> T cells that are both uniquely elicited by this vaccine and associated with efficacy (15, 16). These  
275 observations support a model in which vaccine-induced IL-15 production from myeloid-derived cells  
276 acts on MHC-E-restricted, SIV-specific CD8<sup>+</sup> T cells to facilitate the effector activities that result in  
277 systemic arrest of viral replication in vaccinated, SIV-challenged RM. Thus, we postulate “tuning” by  
278 persistent induction of IL-15 and associated innate immune and immunoregulatory pathways may be  
279 required for the MHC-E-restricted, SIV-specific CD8<sup>+</sup> T cells to mediate arrest of viral replication.

280 Our study also examined the whole blood transcriptional response to administration of bioactive IL-15.  
281 Our functional genomics analyses of the whole blood response shows that IL-15 induces a remarkable  
282 breadth of innate and adaptive immune gene expression including engagement of genes and gene  
283 networks linked to lymphocyte activation, migration and homing, and innate immunity including  
284 pathogen recognition receptor signaling, interferon regulatory factor signaling, and type I interferon  
285 actions (see **Fig 4**). Our study design of serial IL-15 and dose-escalating administration shows that IL-  
286 15 directs a rapid alteration of the blood transcriptome within 1 day to both induce and suppress specific  
287 gene expression from pretreatment baseline levels with similarly rapid homeostatic “resetting” of the  
288 blood gene expression profile two-days later. Moreover, repeated IL-15 dosing and dose escalation  
289 generated a decreased response by day 8 post-initial treatment followed by homeostatic regulation of  
290 gene expression through the remaining 21 days of the time course. These results show that the blood  
291 response wanes and resets after IL-15 withdrawal. By comparing the whole blood response to IL-15 with

292 the RhCMV/SIV vaccine protection signature we were able to identify the IL-15 response genes of  
293 vaccine protection and show that the persistence of this expression signature tracks with vaccine efficacy.  
294 The persistence of the IL-15 signature in the vaccinated and protected animals suggests that RhCMV-  
295 based vaccination induced IL-15 production by one or more cell and/or tissue types *in vivo*, and that  
296 protection from SIV infection occurs when this response persists at least to the time of a virus challenge.  
297 As RMs receiving IL-15 became refractory or exhibited reduced response to high dose IL-15 after serial  
298 administration, the sustained IL-15 signature in the vaccinated protected animals supports the notion that  
299 low, persistent IL-15 production links with RhCMV-SIV vaccine efficacy. Thus, strategies to deliver or  
300 produce a low, sustained production and response to IL-15 may serve as effective adjuvant approaches  
301 to enhance vaccine efficacy.

302 The basis for the differential induction and maintenance of the protection-associated signaling signature  
303 among individual RM is not clear. It is, however, unlikely that differences among RM in vector spread  
304 and persistence account for this heterogeneity, as typical protection is observed with pp71-deleted  
305 RhCMV/SIV vectors that manifest ~1000-fold reduction in *in vivo* spread compared to the vectors used  
306 in this study (10). More likely, host differences in regulation and counter-regulation of these pathways  
307 including the production and response of IL-15 underlie protection vs. non-protection. This protective  
308 signature is an important correlate of RhCMV/SIV vaccine efficacy in RMs, and thus will be crucial for  
309 guiding clinical development of an HCMV/HIV vaccine to recapitulate RhCMV/SIV vector efficacy in  
310 humans.

## 311 **Materials and methods**

### 312 **Rhesus macaques**

313 The experiments reported in this study used a total of 65 purpose-bred male and female RM (*M. mulatta*)  
314 of Indian genetic background, including 15 RM assigned to each of four vaccine groups (oral 68-1  
315 vaccination, subQ 68-1 vaccination, an unvaccinated control group and a subQ 68-1 + 68-1.2 vaccinated

316 test group), and 5 RM administered rRh-Het-IL-15 for the IL-15 blood signature assessment. The  
317 unvaccinated and subQ vaccinated RM cohorts are also reported in Malouli, *et al* (15). At assignment,  
318 all study RM were free of cercopithecine herpesvirus 1, D-type simian retrovirus, simian T-  
319 lymphotropic virus type 1, and *Mycobacterium tuberculosis*, but were naturally RhCMV-infected. All  
320 study RM were housed at the Oregon National Primate Research Center (ONPRC) in Animal Biosafety  
321 level 2 (vaccine phase) and level 2+ (challenge phase) rooms with autonomously controlled temperature,  
322 humidity, and lighting. Study RM were both single- and pair-cage housed. Animals were only paired  
323 with one another during the vaccine phase if they belonged to the same vaccination group. All RM were  
324 single cage-housed during the challenge phase due to the infectious nature of the study. Regardless of  
325 their pairing, all animals had visual, auditory and olfactory contact with other animals. Single cage-  
326 housed RM received an enhanced enrichment plan that was designed and overseen by RM behavior  
327 specialists. RM were fed commercially prepared primate chow twice daily and received supplemental  
328 fresh fruit or vegetables daily. Fresh, potable water was provided via automatic water systems. Physical  
329 exams including body weight and complete blood counts were performed at all protocol time points. RM  
330 were sedated with ketamine HCl or Telazol for procedures, including oral and subQ vaccine  
331 administration, venipuncture, and SIV challenge.

332 All vaccinated RM in this study were administered a single set or 2 sets of three RhCMV/SIV vectors  
333 (68-1 backbone or 68-1 + 68-1.2 backbones), individually expressing SIV Gag, Retanef (Rev/Tat/Nef)  
334 and 5'-Pol (see below), either orally or subcutaneously at a dose of  $5 \times 10^6$  plaque-forming units per  
335 vector, with a second identical vaccination given 18 wks after primary vaccination. At the end of vaccine  
336 phase, all vaccinated and unvaccinated RM were SIV challenged by repeated (every 2-3 wks) intra-rectal  
337 administration of limiting dose (100-300 focus-forming units) SIV<sub>mac239X</sub> (described below) until take of  
338 infection (onset of sustained plasma viremia and/or *de novo* development of CD4<sup>+</sup> and CD8<sup>+</sup> T cell  
339 responses to SIV Vif), at which time challenge was discontinued, as previously described (9, 10, 12).

340 For *in vivo* determination of the transcriptomic response to IL-15, a cohort of five RM were treated with  
341 rRh-Het-IL-15 prepared by Drs. George Pavalakis (National Cancer Institute, USA) and Jeff Lifson  
342 (Frederick National Laboratory, USA) in a dose-escalation manner as follows: 5, 10, and 15  $\mu\text{g}/\text{kg}$  at  
343 D0, D3 and D7 respectively. Whole blood was collected in PAXgene tubes at d 1, 3, 4, 7, 8, 10, 14, 17,  
344 21, and 29 for transcriptomic analysis. RNA samples from *in vivo* rRh-Het-IL-15 treatment were  
345 processed for RNAseq transcriptomic analyses as described below.

### 346 **Ethical Statement**

347 RM care and all experimental protocols and procedures were approved by the ONPRC Institutional  
348 Animal Care and Use Committee. The ONPRC is a Category I facility. The Laboratory Animal Care and  
349 Use Program at the ONPRC is fully accredited by the American Association for Accreditation of  
350 Laboratory Animal Care and has an approved Assurance (#A3304-01) for the care and use of animals  
351 on file with the NIH Office for Protection from Research Risks. The ONPRC adheres to national  
352 guidelines established in the Animal Welfare Act (7 U.S.C. Sections 2131–2159) and the Guide for the  
353 Care and Use of Laboratory Animals (8th Edition) as mandated by the U.S. Public Health Service Policy.

### 354 **Vectors and viruses**

355 Construction and characterization of the 68-1 and 68-1.2 RhCMV/SIV vectors, including  
356 RhCMV/SIV<sub>Gag</sub>, RhCMV/SIV<sub>Retanef(Rev/Tat/Nef)</sub> and RhCMV/SIV<sub>5'-Pol (Pol-1)</sub> have been previously  
357 described (9, 12, 14, 15). Vector stocks were generated on telomerase-immortalized rhesus fibroblasts.  
358 SIV transgene expression was confirmed by immunoblot and all virus stocks were analyzed by next  
359 generation sequencing before *in vivo* use. Virus titers were determined by 50% tissue culture infective  
360 dose endpoint dilution assays. The pathogenic SIV challenge stocks used in these experiments were  
361 generated by expanding SIV<sub>mac239X</sub> (41) in RM PBMCs and were titered using the CMMT-CD4-LTR- $\beta$ -  
362 Gal sMAGI cell assay (National Institutes of Health AIDS Reagent Program).

### 363 **SIV detection assays**



364 Plasma SIV RNA levels were determined using a gag-targeted quantitative real time/digital RT-PCR  
365 format assay, essentially as previously described, with 6 replicate reactions analyzed per extracted  
366 sample for assay thresholds of 15 SIV RNA copies/ml(6, 9, 42). Quantitative assessment of SIV DNA  
367 and RNA in cells and tissues was performed using gag targeted, nested quantitative hybrid real-  
368 time/digital RT-PCR and PCR assays, as previously described (6, 9, 42). SIV RNA or DNA copy  
369 numbers were normalized based on quantitation of a single copy rhesus genomic DNA sequence from  
370 the *CCR5* locus from the same specimen, as described, to allow normalization of SIV RNA or DNA  
371 copy numbers per  $10^8$  diploid genome cell equivalents. Ten replicate reactions were performed with  
372 aliquots of extracted DNA or RNA from each sample, with two additional spiked internal control  
373 reactions performed with each sample to assess potential reaction inhibition. Samples that did not yield  
374 any positive results across the replicate reactions were reported as a value of “less than” the value that  
375 would apply for one positive reaction out of 10. Threshold sensitivities for individual specimens varied  
376 as a function of the number of cells or amount of tissue available and analyzed; for graphing consistency,  
377 values are plotted with a common nominal sensitivity threshold.

### 378 **Immunologic assays**

379 SIV-specific CD4<sup>+</sup> and CD8<sup>+</sup> T cell responses were measured in peripheral blood mononuclear cells  
380 (PBMC) by flow cytometric intracellular cytokine analysis, as previously described(9, 10, 12). Briefly,  
381 individual or whole protein mixes of sequential 15-mer peptides (11 amino acid overlap) spanning the  
382 SIV<sub>mac239</sub> Gag, 5'-Pol, Nef, Rev, Tat, and Vif proteins or individual SIV<sub>mac239</sub> Gag supertope peptides  
383 [Gag<sub>211-222</sub> (53), Gag<sub>276-284</sub> (69), Gag<sub>290-301</sub> (73), Gag<sub>482-490</sub> (120)] were used as antigens in conjunction  
384 with anti-CD28 (CD28.2, Purified 500 ng/test: eBioscience, Custom Bulk 7014-0289-M050) and anti-  
385 CD49d stimulatory mAb (9F10, Purified 500 ng/test: eBioscience, Custom Bulk 7014-0499-M050).  
386 Mononuclear cells were incubated at 37°C with individual peptides or peptide mixes and antibodies for  
387 1h, followed by an additional 8h incubation in the presence of Brefeldin A (5 µg ml<sup>-1</sup>; Sigma-Aldrich).

388 Stimulation in the absence of peptides served as background control. After incubation, stimulated cells  
389 were stored at 4°C until staining with combinations of fluorochrome-conjugated monoclonal antibodies  
390 including: anti-CD3 (SP34-2: Alexa700; BD Biosciences, Custom Bulk 624040, PerCP-Cy5.5; BD  
391 Biosciences, Custom Bulk 624060, and Pacific Blue; BD Biosciences, Custom Bulk 624034), anti-CD4  
392 (L200: AmCyan; BD Biosciences, Custom Bulk 658025, BV510; BD Biosciences, Custom Bulk 624340  
393 and BUV395; BD Biosciences, Custom Bulk 624165), anti-CD8a (SK1: PerCP-eFluor710; Life Tech,  
394 Custom Bulk CUST04424), anti-TNF- $\alpha$  (MAB11: FITC; Life Tech, Custom Bulk CUST03355 and PE;  
395 Life Tech, Custom Bulk CUST04596), anti-IFN- $\gamma$  (B27: APC; BioLegend) and anti-CD69 (FN50: PE;  
396 eBioscience, Custom Bulk CUST01282 and PE/Dazzle594; BioLegend) and for polycytokine analyses,  
397 anti-IL-2 (MQ1-17H12; PE Cy-7; Biolegend), and anti-MIP-1 $\beta$  (D21-1351, BV421; BD Biosciences).  
398 For analysis of memory differentiation (central- vs transitional- vs effector-memory) of SIV Gag-  
399 specific CD4<sup>+</sup> and CD8<sup>+</sup> T cells, PBMC were stimulated as described above, except that the CD28 co-  
400 stimulatory mAb was used as a fluorochrome conjugate to allow CD28 expression levels to be later  
401 assessed by flow cytometry, and in these experiments, cells were surface-stained after incubation for  
402 lineage markers CD3, CD4, CD8, CD95 and CCR7 (see below for mAb clones) prior to  
403 fixation/permeabilization and then intracellular staining for response markers (CD69, IFN- $\gamma$ , TNF- $\alpha$ ;  
404 note that Brefeldin A treatment preserves the pre-stimulation cell-surface expression phenotype of  
405 phenotypic markers examined in this study).

406 Flow cytometry analysis was performed using an LSR-II flow cytometer (BD Biosciences). Data  
407 analysis was performed using FlowJo software (Tree Star). In all analyses, gating on the lymphocyte  
408 population was followed by the separation of the CD3<sup>+</sup> T cell subset and progressive gating on CD4<sup>+</sup>  
409 and CD8<sup>+</sup> T cell subsets. Antigen-responding cells in both CD4<sup>+</sup> and CD8<sup>+</sup> T cell populations were  
410 determined by their intracellular expression of CD69 and either or both of the cytokines IFN- $\gamma$  and TNF- $\alpha$ .  
411  $\alpha$  (or in polycytokine analyses, expression of CD69 and any combination of the cytokines: IFN- $\gamma$ , TNF- $\alpha$ ,

412 IL-2, MIP-1 $\beta$ ). For longitudinal immunological assessment during vaccine and challenge phases, assay  
413 limit of detection was determined, as previously described(7), with 0.05% after background subtraction  
414 being the minimum threshold used in this study. After background subtraction, the raw response  
415 frequencies above the assay limit of detection were “memory-corrected” (e.g., % responding out of the  
416 memory population), as previously described(6, 7, 9, 42), using combinations of the following  
417 fluorochrome-conjugated mAbs to define the memory vs naïve subsets: CD3 (SP34-2: Alexa700 and  
418 PerCP-Cy5.5), CD4 (L200: AmCyan and BV510), CD8a (SK-1: PerCP-eFluor710, RPA-T8: APC;  
419 BioLegend), TNF- $\alpha$  (MAB11; FITC), IFN- $\gamma$  (B27; APC), CD69 (FN50; PE), CD28 (CD28.2; PE/Dazzle  
420 594, BioLegend and BV510, BD Biosciences), CD95 (DX2; PE, BioLegend and PE-Cy7, BioLegend),  
421 CCR7 (15053; Biotin, R&D Systems), streptavidin (Pacific Blue, Life Tech and BV605; BD  
422 Biosciences, Custom Bulk 624342) and Ki67 (B56; FITC, BD Biosciences, Custom Bulk 624046). For  
423 memory phenotype analysis of SIV Gag-specific T cells, all CD4<sup>+</sup> or CD8<sup>+</sup> T cells expressing CD69  
424 plus IFN- $\gamma$  and/or TNF- $\alpha$  were first Boolean OR gated, and then this overall Ag-responding population  
425 was subdivided into the memory subsets of interest on the basis of surface phenotype (CCR7 vs CD28).  
426 Similarly, for polycytokine analysis of SIV Gag-specific T cells, all CD4<sup>+</sup> or CD8<sup>+</sup> T cells expressing  
427 CD69 plus cytokines were Boolean OR gated and polyfunctionality was delineated with any combination  
428 of the four cytokines tested (IFN- $\gamma$ , TNF- $\alpha$ , IL-2, MIP-1 $\beta$ ) using the Boolean AND function.

#### 429 **RNA sequencing**

430 Whole blood was collected from RM in PAXgene RNA tubes (PreAnalytiX) following the  
431 manufacturer's procedures. (PreAnalytiX). RNA was isolated using PAXgene Blood miRNA kits  
432 (Qiagen) following the protocol provided with the kit that included an on-column DNase treatment. The  
433 quality and concentration of the recovered RNA was determined using a LabChip GXII (PerkinElmer)  
434 instrument and a ribogreen-based RNA assay, respectively. mRNA-seq libraries were constructed using  
435 Illumina TruSeq® Stranded mRNA HT kit following the manufacturer’s recommended protocol.

436 Libraries were sequenced on an Illumina NextSeq500 sequencer using Illumina NextSeq 500/550 High  
437 Output v2 kits (150 cycles) following the manufacturer's protocol for sample handling and loading.  
438 Sequencing run metrics were visualized for quality assurance using Illumina's BaseSpace platform, and  
439 the quality of mRNA-seq reads were assessed using FastQC version 0.11.3  
440 (<http://www.bioinformatics.babraham.ac.uk/projects/fastqc>). Both rhesus globin and ribosomal  
441 sequences were filtered via alignments with Bowtie v2.1.0 (43). Adapters were digitally removed using  
442 cutadapt, version 1.8.3: <https://doi.org/10.14806/ej.17.1.200>. Subsequently, a minimum of twenty  
443 million raw reads were mapped to the *Macaque mulatta* genome Mmul\_1 (obtained from iGenomes:  
444 [https://support.illumina.com/sequencing/sequencing\\_software/igenome.html](https://support.illumina.com/sequencing/sequencing_software/igenome.html) ) with STAR v2.4.0h1  
445 (44) followed by HTSeq-count v0.6.1p1 (45) to generate gene counts.

#### 446 **Evaluation of baseline differences**

447 To determine whether or not a preexisting gene expression pattern was present at W0D0 that might be  
448 linked to vaccine protection, we applied hierarchical clustering using the Ward agglomerative clustering  
449 method with Euclidean distance to assess wk0, d0 time point normalized gene expression values of each  
450 animal compared to one another. Furthermore, the Pearson correlation coefficient was calculated across  
451 the wk0, d0 data set, showing that all animals of the training set exhibited wk0, d0 baseline gene  
452 expression signatures similar to one another independently of vaccine protection outcome.

#### 453 **Preparation for analysis of differential expression**

454 Based on the raw read counts, outlier samples and genes with a maximum expression across all samples  
455 below 100 counts were removed. Using R (v 3.6.0)/Bioconductor(v 3.9), counts were then transformed  
456 into counts per million using the voom function(46) in the R library *limma* (47) with a smoothing window  
457 of 0.1. CPMs were normalized using the quantile method. Differential expression was performed using  
458 the *limma* package in R/Bioconductor (48). Additional graphics packages were utilized for the  
459 visualization of numbers of DE genes (*ggplot2*; <https://ggplot2.tidyverse.org>) and heat maps (*gplots*;

460 <https://www.rdocumentation.org/packages/gplots/versions/3.1.0>) using wk0, d0 as the common baseline  
461 comparator for each animal in the training set and the validation set cohorts.

## 462 **Differential expression analysis**

463 To determine the list of significantly differentially expressed genes in the RhCMV/SIV vector-  
464 vaccinated cohort as well as in the rRh-Het-IL-15 experiment, we used the *lmFit* function in the R library  
465 *limma* (47). Genes with a false discovery rate (FDR)-adjusted p-value  $\leq 0.05$  and absolute  $\log_2$  fold  
466 change (compared to baseline) above 1.5 were defined as significantly differentially expressed (DE). To  
467 define gene correlates of vaccine protection we determined the set of genes for which the baseline-  
468 subtracted expression values significantly differed between protected and non-protected outcome groups  
469 of the training set cohort (DDE). Genes with FDR-adjusted  $p \leq 0.05$  and absolute  $\log_2(\text{FC})$  (across  
470 protection groups) above 1.5 were defined as significantly differentially DE (DDE). These genes were  
471 identified using the interaction effect between time point (compared to baseline) and vaccine protection.

## 472 **Principle component analysis (PCA)**

473 PCA was performed on the per-timepoint mean  $\log_2(\text{FC})$  values, using all expressed genes and averaged  
474 over the RMs within each treatment and outcome group. We used the R function PCA in the *FactoMineR*  
475 library, with variance scaling enabled and keeping 7 dimensions in the output. For each of the top 7  
476 dimensions, we included the genes most highly correlated with the PC. The number of genes selected  
477 from each dimension was the dimension's percentage explained variance times 2.5 (an arbitrary value  
478 selected to balance figure size with information content).

## 479 **Exploratory pathway analyses**

480 Enrichment tests and network analyses for pathways and upstream regulators were performed using  
481 Ingenuity Pathway Analysis (49) (Sept 2019 version for Fig. 2; March 2020 version for Fig3). IL-15-  
482 regulated networks were identified using GeneMANIA(50). Co-expression analyses were performed  
483 only on DE genes. We conducted clustering analysis using Ward clustering and Euclidean distance on

484 the union of  $\log_2(\text{FC})$  values using the *WGCNA*, *heatmap.2*, and *EdgeR* Bioconductor packages in R(51-  
485 53).

#### 486 **Hierarchical cluster analysis and heatmap generation**

487 For correlation analysis of the fold-change values displayed in heatmaps, we used midweight  
488 bicorrelation, a modified version of Pearson correlation (bicor function in the R library *WGCNA*), and  
489 complete linkage clustering. The clusters were defined using the cutree function (R library *stats*) (54).  
490 All trees were cut with height 1.4, which corresponds to a midweight bicorrelation coefficient of -0.4  
491 because the analysis is constructed by shifting the correlations to the range (0,2), resulting in four clusters  
492 in both instances. The heatmaps were drawn using the heatmap.2 function (R library *gplots*).

#### 493 **Permutation testing**

494 To formally test whether the DDE and pathway-linked gene signatures significantly differentiate  
495 protected vs. unprotected RMs over the course of study, we devised and followed a formal statistical  
496 analysis plan. Briefly, we defined a test statistic aggregating over genes and time and compared this to a  
497 null distribution that controls for the observed data (including all correlations across genes, which is  
498 ignored in the primary linear modeling analysis described above). In this procedure we first calculate,  
499 for each gene, the absolute value of the mean over time of the difference in  $\log_2(\text{FC})$  across protection  
500 groups. For the DDE analysis, the primary test statistic is the sum of the above value across all  
501 significantly DDE genes. We then compare this value to its empirical null distribution, approximated by  
502 sampling protection outcomes within each treatment group over 5000 permutations sampled with  
503 replacement. Note that for each permutation, the list of significantly DDE genes is allowed to change  
504 (the value of the test statistic was set to zero for permutations in which no genes were significantly DDE).  
505 We then repeated this analysis, where instead of the DDE gene list, we used the gene lists related to the  
506 IL-15 response, TCR signaling pathway, TLR signaling pathway, and Inflammasome pathway. These  
507 gene lists are fixed and do not vary across permutations; otherwise, all other aspects of the fixed-list

508 analyses were identical to the DDE permutation analysis. Unadjusted p-values are the proportion of the  
509 5000 permutations  $\geq$  the observed test statistic (a one-sided test; the statistic is an absolute value, so it  
510 is always positive). To evaluate the hypothesis that the IL-15 response signature component of DDE  
511 genes is expressed among protected RM more than non-protected RM, we devised a consistency test  
512 statistic that directly addresses the hypothesis that protected RM have a response to vaccination  
513 consistent with a response to IL-15 administration. This test statistic compares across protection  
514 categories a summary measure indicating the extent to which the gene response to RhCMV/SIV  
515 vaccination is consistent with the response to IL-15 administration (up-regulated genes going up, down-  
516 regulated genes going down), by measuring the difference across two gene lists of the sum of the average  
517  $\log_2(\text{FC})$  over time: the total among those genes up-regulated by IL-15 administration minus the total  
518 among those down-regulated by it. For these analyses, instead of sampling from all possible permutations  
519 with replacement, we evaluated the support of the null hypothesis exhaustively resulting in an exact test  
520 (with 5005 possible configurations in evaluating the validation cohort, and 6435 when evaluating the  
521 subQ cohort). Unadjusted p-values for these tests are the proportion of the null distribution  $\geq$  the  
522 observed test statistic (testing a one-sided hypothesis).

### 523 **Additional statistical analyses**

524 Pre-vaccination transcriptome correlation analysis was conducted using Pearson correlation. Viral load  
525 and immunologic data are presented as boxplots with jittered points and a box from 1st to 3rd quartiles  
526 (IQR) and a line at the median, with whiskers extending to the farthest data point within  $1.5 \times \text{IQR}$  above  
527 and below the box. Analyses of longitudinal ICS data were performed by calculating the per-RM average  
528 T-cell response over three periods: post-prime peak (2-6 weeks), post-boost peak (20-24 weeks), and  
529 plateau (61-90 weeks), and comparing these values between RMs receiving subQ vs. oral vaccine using  
530 the nonparametric Wilcoxon rank-sum test. All P-values are based on two-sided tests and unadjusted  
531 except where noted. Adjusted P-values were computed using the Holm procedure for family-wise error

532 rate control.

### 533 **Data and code availability**

534 Transcriptomics data sets are deposited at the Gene Expression Omnibus  
535 <https://www.ncbi.nlm.nih.gov/geo/> under accession number GSE160562. The R markdown code applied  
536 to these analyses can be accessed at <https://github.com/galelab/GaleGEAnalysis> and at  
537 <https://github.com/komorowskilab/R.ROSETTA>.

### 538 Links to software:

539 STAR aligner: <https://github.com/alexdobin/STAR>

540 Bowtie2: <http://bowtie-bio.sourceforge.net/bowtie2/index.shtml>

541 HTseq: <https://github.com/simon-anders/htseq>

542 FASTQC: <https://www.bioinformatics.babraham.ac.uk/projects/fastqc/>

543 Cutadapt: <https://github.com/marcelm/cutadapt>

544 Venny: <http://bioinfo.gp.cnb.csic.es/tools/venny/index.html>

545 Ingenuity Pathway Analysis: [https://digitalinsights.qiagen.com/products-overview/discovery-](https://digitalinsights.qiagen.com/products-overview/discovery-insights-portfolio/analysis-and-visualization/qiagen-ipa/)  
546 [insights-portfolio/analysis-and-visualization/qiagen-ipa/](https://digitalinsights.qiagen.com/products-overview/discovery-insights-portfolio/analysis-and-visualization/qiagen-ipa/)

547 Genemania: <https://genemania.org/>

### 548 **Author contributions**

549 SGH planned and performed animal experiments and immunologic assays, assisted by CMH, DM, KR,  
550 ANS, JCF, EA, and RMG. MKA supervised animal procedures and care. JDL planned and supervised  
551 SIV quantification by PCR/RT-PCR assisted by KO, RS, RF, and WJB. GNP, BKF, and JDL prepared  
552 and provided rRh-Het-IL-15 and developed methodology for use. YF and BER performed the *in vivo*  
553 analysis of rRh-Het-IL-15 administration to RM. LL supervised sample intake, processing, and  
554 assignment for RNAseq. ES, JC, and IG conducted RNA processing, library construction, sequencing,  
555 and computational quality control of sequence reads. FB conducted bioinformatics analyses, including



556 linear modeling. JK developed linear modeling applications. CD, RRG, XP, LW, DN, SF, and RPS  
557 conducted specific bioinformatics analyses. PTE planned, conducted and supervised statistical analyses,  
558 assisted by EW, JS, and WS. LJP conceived the RhCMV vector strategy, supervised all RM experiments  
559 and immunologic analyses, analyzed and interpreted data. MG led the RNA sequencing and  
560 bioinformatics analyses. LJP and MG cowrote the manuscript. Correspondence and request for materials  
561 should be addressed to either MG ([mgale@uw.edu](mailto:mgale@uw.edu)) or LJP ([pickerl@ohsu.edu](mailto:pickerl@ohsu.edu)).

## 562 **Acknowledgments**

563 This work was supported by the National Institute of Allergy and Infectious Diseases (NIAID) contract  
564 HHSN272201800008C, and grants P30 AI027757-31 and P51 OD010425 (MG); grants P01 AI094417,  
565 U19 AI128741, UM1 AI124377, and R37 AI054292 (LJP), the Oregon National Primate Research  
566 Center Core grant from the National Institutes of Health, Office of the Director (P51 OD011092); by the  
567 Intramural Research Program of the National Cancer Institute (GNP and BKF), and by contracts from  
568 the National Cancer Institute (# HHSN261200800001E; JDL). The authors thank C. Bergamaschi, J.  
569 Bear, E. Chertova, R. Sowder, D. Roser, and J. Bess, Jr., for purification and biochemical  
570 characterization of the rRh-Het-IL-15 and information on its use. OHSU, LJP and SGH have a  
571 substantial financial interest in Vir Biotechnology, Inc., a company that may have a commercial interest  
572 in the results of this research and technology. LJP and SGH are also consultants to Vir Biotechnology,  
573 Inc. Other authors have no potential conflicts of interest.

## 574 **References**

- 575 1. UNAIDS. Global AIDS Update 2020. 2020.
- 576 2. Picker LJ, Hansen SG, Lifson JD. New paradigms for HIV/AIDS vaccine development. *Annu Rev*  
577 *Med.* 2012;63:95-111.
- 578 3. Barouch DH, Picker LJ. Novel vaccine vectors for HIV-1. *Nat Rev Microbiol.* 2014;12(11):765-71.

- 579 4. Martins MA, Watkins DI. What Is the Predictive Value of Animal Models for Vaccine Efficacy in  
580 Humans? Rigorous Simian Immunodeficiency Virus Vaccine Trials Can Be Instructive. *Cold*  
581 *Spring Harb Perspect Biol.* 2018;10(4).
- 582 5. Hansen SG, Vieville C, Whizin N, Coyne-Johnson L, Siess DC, Drummond DD, et al. Effector  
583 memory T cell responses are associated with protection of rhesus monkeys from mucosal simian  
584 immunodeficiency virus challenge. *Nat Med.* 2009;15(3):293-9.
- 585 6. Hansen SG, Womack J, Scholz I, Renner A, Edgel KA, Xu G, et al. Cytomegalovirus vectors  
586 expressing *Plasmodium knowlesi* antigens induce immune responses that delay parasitemia upon  
587 sporozoite challenge. *PLoS One.* 2019;14(1):e0210252.
- 588 7. Hansen SG, Zak DE, Xu G, Ford JC, Marshall EE, Malouli D, et al. Prevention of tuberculosis in  
589 rhesus macaques by a cytomegalovirus-based vaccine. *Nat Med.* 2018;24(2):130-43.
- 590 8. Masopust D, Picker LJ. Hidden memories: frontline memory T cells and early pathogen  
591 interception. *J Immunol.* 2012;188(12):5811-7.
- 592 9. Hansen SG, Piatak M, Jr., Ventura AB, Hughes CM, Gilbride RM, Ford JC, et al. Immune clearance  
593 of highly pathogenic SIV infection. *Nature.* 2013;502(7469):100-4.
- 594 10. Hansen SG, Marshall EE, Malouli D, Ventura AB, Hughes CM, Ainslie E, et al. A live-attenuated  
595 RhCMV/SIV vaccine shows long-term efficacy against heterologous SIV challenge. *Sci Transl*  
596 *Med.* 2019;11(501).
- 597 11. Okoye AA, Hansen SG, Vaidya M, Fukazawa Y, Park H, Duell DM, et al. Early antiretroviral  
598 therapy limits SIV reservoir establishment to delay or prevent post-treatment viral rebound. *Nat*  
599 *Med.* 2018;24(9):1430-40.
- 600 12. Hansen SG, Ford JC, Lewis MS, Ventura AB, Hughes CM, Coyne-Johnson L, et al. Profound early  
601 control of highly pathogenic SIV by an effector memory T-cell vaccine. *Nature.*  
602 2011;473(7348):523-7.

- 603 13. Hansen SG, Sacha JB, Hughes CM, Ford JC, Burwitz BJ, Scholz I, et al. Cytomegalovirus vectors  
604 violate CD8<sup>+</sup> T cell epitope recognition paradigms. *Science*. 2013;340(6135):1237874.
- 605 14. Hansen SG, Wu HL, Burwitz BJ, Hughes CM, Hammond KB, Ventura AB, et al. Broadly targeted  
606 CD8<sup>+</sup> T cell responses restricted by major histocompatibility complex E. *Science*. 2016.
- 607 15. Malouli D, Hansen SG, Hancock MH, Hughes CM, Ford JC, Gilbride RM, et al. Cytomegaloviral  
608 determinants of CD8<sup>+</sup> T cell programming and RhCMV/SIV vaccine efficacy. *bioRxiv*  
609 *2020.09.30.321349*; doi: <https://doi.org/10.1101/2020.09.30.321349> (2020).
- 610 16. Verweij M, Hansen SG, Iyer R, John N, Malouli D, Morrow D, et al. Modulation of MHC-E  
611 transport by viral decoy ligands is required for RhCMV/SIV vaccine efficacy. *bioRxiv*  
612 *2020.09.30.321158*; doi: <https://doi.org/10.1101/2020.09.30.321158> (2020).
- 613 17. Hoff H, Brunner-Weinzierl MC. The tyrosine phosphatase SHP-2 regulates differentiation and  
614 apoptosis of individual primary T lymphocytes. *Eur J Immunol*. 2007;37(4):1072-86.
- 615 18. Morales LD, Casillas Pavon EA, Shin JW, Garcia A, Capetillo M, Kim DJ, et al. Protein tyrosine  
616 phosphatases PTP-1B, SHP-2, and PTEN facilitate Rb/E2F-associated apoptotic signaling. *PLoS*  
617 *One*. 2014;9(5):e97104.
- 618 19. Shinzawa M, Konno H, Qin J, Akiyama N, Miyauchi M, Ohashi H, et al. Catalytic subunits of the  
619 phosphatase calcineurin interact with NF-kappaB-inducing kinase (NIK) and attenuate NIK-  
620 dependent gene expression. *Sci Rep*. 2015;5:10758.
- 621 20. Wu W, Chen Q, Geng F, Tong L, Yang R, Yang J, et al. Calcineurin B stimulates cytokine  
622 production through a CD14-independent Toll-like receptor 4 pathway. *Immunol Cell Biol*.  
623 2016;94(3):285-92.
- 624 21. Goodwin CB, Yang Z, Yin F, Yu M, Chan RJ. Genetic disruption of the PI3K regulatory subunits,  
625 p85alpha, p55alpha, and p50alpha, normalizes mutant PTPN11-induced hypersensitivity to GM-  
626 CSF. *Haematologica*. 2012;97(7):1042-7.

- 627 22. Au-Yeung BB, Shah NH, Shen L, Weiss A. ZAP-70 in Signaling, Biology, and Disease. *Annu Rev*  
628 *Immunol.* 2018;36:127-56.
- 629 23. Raeber ME, Zurbuchen Y, Impellizzieri D, Boyman O. The role of cytokines in T-cell memory in  
630 health and disease. *Immunol Rev.* 2018;283(1):176-93.
- 631 24. Wang C, Collins M, Kuchroo VK. Effector T cell differentiation: are master regulators of effector  
632 T cells still the masters? *Curr Opin Immunol.* 2015;37:6-10.
- 633 25. Prendergast GC, Metz R, Muller AJ, Merlo LM, Mandik-Nayak L. IDO2 in Immunomodulation  
634 and Autoimmune Disease. *Front Immunol.* 2014;5:585.
- 635 26. Simeoni L, Lindquist JA, Smida M, Witte V, Arndt B, Schraven B. Control of lymphocyte  
636 development and activation by negative regulatory transmembrane adapter proteins. *Immunol Rev.*  
637 2008;224:215-28.
- 638 27. Chen PH, Yao H, Huang LJ. Cytokine Receptor Endocytosis: New Kinase Activity-Dependent and  
639 -Independent Roles of PI3K. *Front Endocrinol (Lausanne).* 2017;8:78.
- 640 28. Jabri B, Abadie V. IL-15 functions as a danger signal to regulate tissue-resident T cells and tissue  
641 destruction. *Nat Rev Immunol.* 2015;15(12):771-83.
- 642 29. Picker LJ, Reed-Inderbitzin EF, Hagen SI, Edgar JB, Hansen SG, Legasse A, et al. IL-15 induces  
643 CD4 effector memory T cell production and tissue emigration in nonhuman primates. *J Clin Invest.*  
644 2006;116(6):1514-24.
- 645 30. Guo Y, Luan L, Patil NK, Sherwood ER. Immunobiology of the IL-15/IL-15Ralpha complex as an  
646 antitumor and antiviral agent. *Cytokine Growth Factor Rev.* 2017;38:10-21.
- 647 31. Verbist KC, Klonowski KD. Functions of IL-15 in anti-viral immunity: multiplicity and variety.  
648 *Cytokine.* 2012;59(3):467-78.
- 649 32. Waldmann TA, Miljkovic MD, Conlon KC. Interleukin-15 (dys)regulation of lymphoid  
650 homeostasis: Implications for therapy of autoimmunity and cancer. *J Exp Med.* 2020;217(1).

- 651 33. Bergamaschi C, Rosati M, Jalah R, Valentin A, Kulkarni V, Alicea C, et al. Intracellular interaction  
652 of interleukin-15 with its receptor alpha during production leads to mutual stabilization and  
653 increased bioactivity. *J Biol Chem.* 2008;283(7):4189-99.
- 654 34. Dubois S, Mariner J, Waldmann TA, Tagaya Y. IL-15Ralpha recycles and presents IL-15 In trans  
655 to neighboring cells. *Immunity.* 2002;17(5):537-47.
- 656 35. Bergamaschi C, Bear J, Rosati M, Beach RK, Alicea C, Sowder R, et al. Circulating IL-15 exists as  
657 heterodimeric complex with soluble IL-15Ralpha in human and mouse serum. *Blood.*  
658 2012;120(1):e1-8.
- 659 36. Bergamaschi C, Watson DC, Valentin A, Bear J, Peer CJ, Figg WD, Sr., et al. Optimized  
660 administration of hetIL-15 expands lymphocytes and minimizes toxicity in rhesus macaques.  
661 *Cytokine.* 2018;108:213-24.
- 662 37. Watson DC, Moysi E, Valentin A, Bergamaschi C, Devasundaram S, Fortis SP, et al. Treatment  
663 with native heterodimeric IL-15 increases cytotoxic lymphocytes and reduces SHIV RNA in lymph  
664 nodes. *PLoS Pathog.* 2018;14(2):e1006902.
- 665 38. Chertova E, Bergamaschi C, Chertov O, Sowder R, Bear J, Roser JD, et al. Characterization and  
666 favorable in vivo properties of heterodimeric soluble IL-15.IL-15Ralpha cytokine compared to IL-  
667 15 monomer. *J Biol Chem.* 2013;288(25):18093-103.
- 668 39. Franz M, Rodriguez H, Lopes C, Zuberi K, Montojo J, Bader GD, et al. GeneMANIA update 2018.  
669 *Nucleic Acids Res.* 2018;46(W1):W60-W4.
- 670 40. Schneider WM, Chevillotte MD, Rice CM. Interferon-stimulated genes: a complex web of host  
671 defenses. *Annu Rev Immunol.* 2014;32:513-45.
- 672 41. Del Prete GQ, Park H, Fennessey CM, Reid C, Lipkey L, Newman L, et al. Molecularly tagged  
673 simian immunodeficiency virus SIVmac239 synthetic swarm for tracking independent infection  
674 events. *J Virol.* 2014;88(14):8077-90.

- 675 42. Hansen SG, Piatak M, Ventura AB, Hughes CM, Gilbride RM, Ford JC, et al. Addendum: Immune  
676 clearance of highly pathogenic SIV infection. *Nature*. 2017;547(7661):123-4.
- 677 43. Langmead B, Salzberg SL. Fast gapped-read alignment with Bowtie 2. *Nat Methods*.  
678 2012;9(4):357-9.
- 679 44. Dobin A, Davis CA, Schlesinger F, Drenkow J, Zaleski C, Jha S, et al. STAR: ultrafast universal  
680 RNA-seq aligner. *Bioinformatics*. 2013;29(1):15-21.
- 681 45. Anders S, Pyl PT, Huber W. HTSeq--a Python framework to work with high-throughput sequencing  
682 data. *Bioinformatics*. 2015;31(2):166-9.
- 683 46. Law CW, Chen Y, Shi W, Smyth GK. voom: Precision weights unlock linear model analysis tools  
684 for RNA-seq read counts. *Genome Biol*. 2014;15(2):R29.
- 685 47. Ritchie ME, Phipson B, Wu D, Hu Y, Law CW, Shi W, et al. limma powers differential expression  
686 analyses for RNA-sequencing and microarray studies. *Nucleic Acids Res*. 2015;43(7):e47.
- 687 48. Gentleman RC, Carey VJ, Bates DM, Bolstad B, Dettling M, Dudoit S, et al. Bioconductor: open  
688 software development for computational biology and bioinformatics. *Genome Biol*.  
689 2004;5(10):R80.
- 690 49. Kramer A, Green J, Pollard J, Jr., Tugendreich S. Causal analysis approaches in Ingenuity Pathway  
691 Analysis. *Bioinformatics*. 2014;30(4):523-30.
- 692 50. Warde-Farley D, Donaldson SL, Comes O, Zuberi K, Badrawi R, Chao P, et al. The GeneMANIA  
693 prediction server: biological network integration for gene prioritization and predicting gene  
694 function. *Nucleic Acids Res*. 2010;38(Web Server issue):W214-20.
- 695 51. Wan Q, Tang J, Han Y, Wang D. Co-expression modules construction by WGCNA and identify  
696 potential prognostic markers of uveal melanoma. *Exp Eye Res*. 2018;166:13-20.
- 697 52. Robinson MD, McCarthy DJ, Smyth GK. edgeR: a Bioconductor package for differential  
698 expression analysis of digital gene expression data. *Bioinformatics*. 2010;26(1):139-40.

- 699 53. Langfelder P, Horvath S. WGCNA: an R package for weighted correlation network analysis. BMC  
700 Bioinformatics. 2008;9:559.
- 701 54. Langfelder P, Zhang B, Horvath S. Defining clusters from a hierarchical cluster tree: the Dynamic  
702 Tree Cut package for R. Bioinformatics. 2008;24(5):719-20.

703 **Abbreviations**

704 Bo, boost; DE, differentially expressed; DDE, differential expression of DE genes (protected vs. non-  
705 protected), EM, effector-memory; FC, fold-change; FDR, false discovery rate; ICS, intracellular  
706 cytokine staining; IRF, interferon regulatory factor; ISGs, interferon stimulated genes; ONPRC, Oregon  
707 National Primate Research Center; PI3K, phosphatidylinositol responsive kinase; Pr, prime; preCh, pre-  
708 challenge; PC, principal component; PCA, principal component analysis; RhCMV, Rhesus  
709 Cytomegalovirus; RMs, rhesus macaques; SIV, Simian Immunodeficiency Virus; subQ, subcutaneous  
710

711

712 **Figure legends**

713 **Figure 1. Virologic and immunologic responses in Rh/CMV vaccination and SIV challenge. (A)**

714 Schematic of the vaccine phase of the two cohorts of RM (n = 15 each) administered the 68-1  
715 RhCMV/SIV vector set by either subcutaneous or oral routes at wk0 Pr and wk18 Bo, indicating time  
716 points for which whole blood samples were collected for RNAseq analysis. Repeated limiting dose  
717 SIV<sub>mac239</sub> challenge was initiated at wk91. **(B,C)** Assessment of the outcome of effective challenge by  
718 longitudinal analysis of the *de novo* development of SIV Vif-specific CD4<sup>+</sup> and CD8<sup>+</sup> T cell responses  
719 **(B)** and plasma viral load **(C)**. RM were challenged until the onset of any above-threshold SIV Vif-  
720 specific T cell response, with the SIV dose administered 2 or 3 weeks prior to this response detection  
721 considered the infecting challenge (week 0). RM with sustained viremia were considered not protected;  
722 RM with no or transient viremia were considered protected (9, 10, 12). **(D)** Bone marrow (BM),  
723 peripheral lymph node (LN) and peripheral blood mononuclear cell (PBMC) samples from all vaccine-  
724 protected RM and representative non-protected or unvaccinated control RM, collected from between day  
725 28 and day 56 post-SIV infection, were analyzed by nested, quantitative PCR/RT-PCR for cell-  
726 associated SIV DNA and RNA. The horizontal line indicates the threshold of detection (B.T. = below  
727 threshold) with data points below this line reflecting no positive reactions across all replicates. Above  
728 threshold cell-associated SIV RNA was detected in LN and BM of all protected RM, confirming SIV  
729 infection take.

730 **Figure 2. Identification of DE genes after RhCMV/SIV vaccination in protected vs. non-protected**

731 **RM. Figure S3. Wk0, d0 signature comparison. (A, B)** Week 0, d0 signature comparisons. **(A)** Ward  
732 hierarchical clustering of animals by their log count per million (CPM) values at baseline was performed  
733 to evaluate initial similarity between animals. O and S indicate animals from oral or subQ vaccine  
734 administration, respectively. Red: protected, black: non-protected. **(B)** Pearson correlation matrix of



735 animals based on their log CPM values at baseline to evaluate initial similarity. Animals are grouped by  
736 protection status and oral (green) or subQ (blue) vaccine administration. **(C)** PCA of the per-time point  
737 mean log<sub>2</sub> fold-change (FC) values, using all expressed genes and averaged over the RMs within each  
738 treatment and outcome group, showing the mean log<sub>2</sub>(FC) of all expressed genes per time point in oral  
739 (circles) and subcutaneous (diamonds) for protected (red) and non-protected (black) RMs. **(D)** Upper:  
740 number of DE genes per time point in each group. Lower: Heatmap showing genes most associated with  
741 each PC, for the first 7 principal components. Percent variance explained by each PC is shown at left.  
742 Prime, boost, and pre-challenge time points are shown at bottom.

743 **Figure 3. Gene and pathway correlates of protection.** **(A)** Heatmap showing all DDE genes. Four  
744 clusters were defined using hierarchical clustering. **(B)** Ingenuity pathway analysis of the four major  
745 DDE gene clusters. **(C)** Network of direct physical interactions between major enriched immune  
746 pathways with red and blue arrows indicating activating and inhibitory interactions, respectively. P-  
747 values for the association of each pathway with vaccine protection are based on permutation testing. **(D)**  
748 Network overview of JAK-STAT signaling in enriched interleukin pathways. **(E)** Heatmap of gene  
749 expression changes for expressed interleukin genes (**left**), and their enrichment as upstream regulators  
750 of DDE genes using Ingenuity analysis (**right**).

751 **Figure 4. The IL-15 response links with correlates of vaccine protection.** **(A)** Study design – RM  
752 treatment with rRh-Het-IL-15. **(B)** Heatmap of DDE gene correlates of protection regulated by IL-15  
753 (IL-15 DE genes on d1 post-administration). **(C)** Ingenuity pathway and upstream regulator enrichment  
754 analyses for gene cluster A and B from panel B. **(D, E)** *De novo* network of genes from Cluster 1 (D),  
755 and (E) Cluster 2 were constructed in GeneMania. Transcription factor nodes are indicated by thick  
756 borders with connections shown as gray lines and blue arrows, showing co-expression interactions  
757 (GeneMania) and direct transcription factor-target interactions (Ingenuity), respectively.

758 **Figure 5. Validation of the IL-15 response signature of protection.** (A) Heatmaps comparing the IL-  
759 15 response signature (overlap of DDE and day 1 IL-15 DE genes as shown in **Fig. 4 B**) in the validation  
760 cohort (left panel; 68-1 + 68-1.2 RhCMV/SIV vaccinated; 6 of 15 protected) vs. the original subQ 68-1  
761 RhCMV/SIV vaccinated cohort (right panel; 8 of 15 protected). P-values for the association of the IL-  
762 15 response signature with vaccine protection are 0.074 and 0.030 for the validation and SubQ cohorts,  
763 respectively (based on permutation testing). (B) Pearson correlation coefficients between the IL-15  
764 response signature  $\log_2(\text{FC})$  after one day of IL-15 administration and the group average  $\log_2(\text{FC})$  at  
765 each time point from the DE analysis of the validation cohort (**left**) and the 68-1 subQ vaccinated cohort  
766 (**right**). Red and black points indicate correlation with values in protected and non-protected RMs,  
767 respectively.  
768

769 **Figure 1**

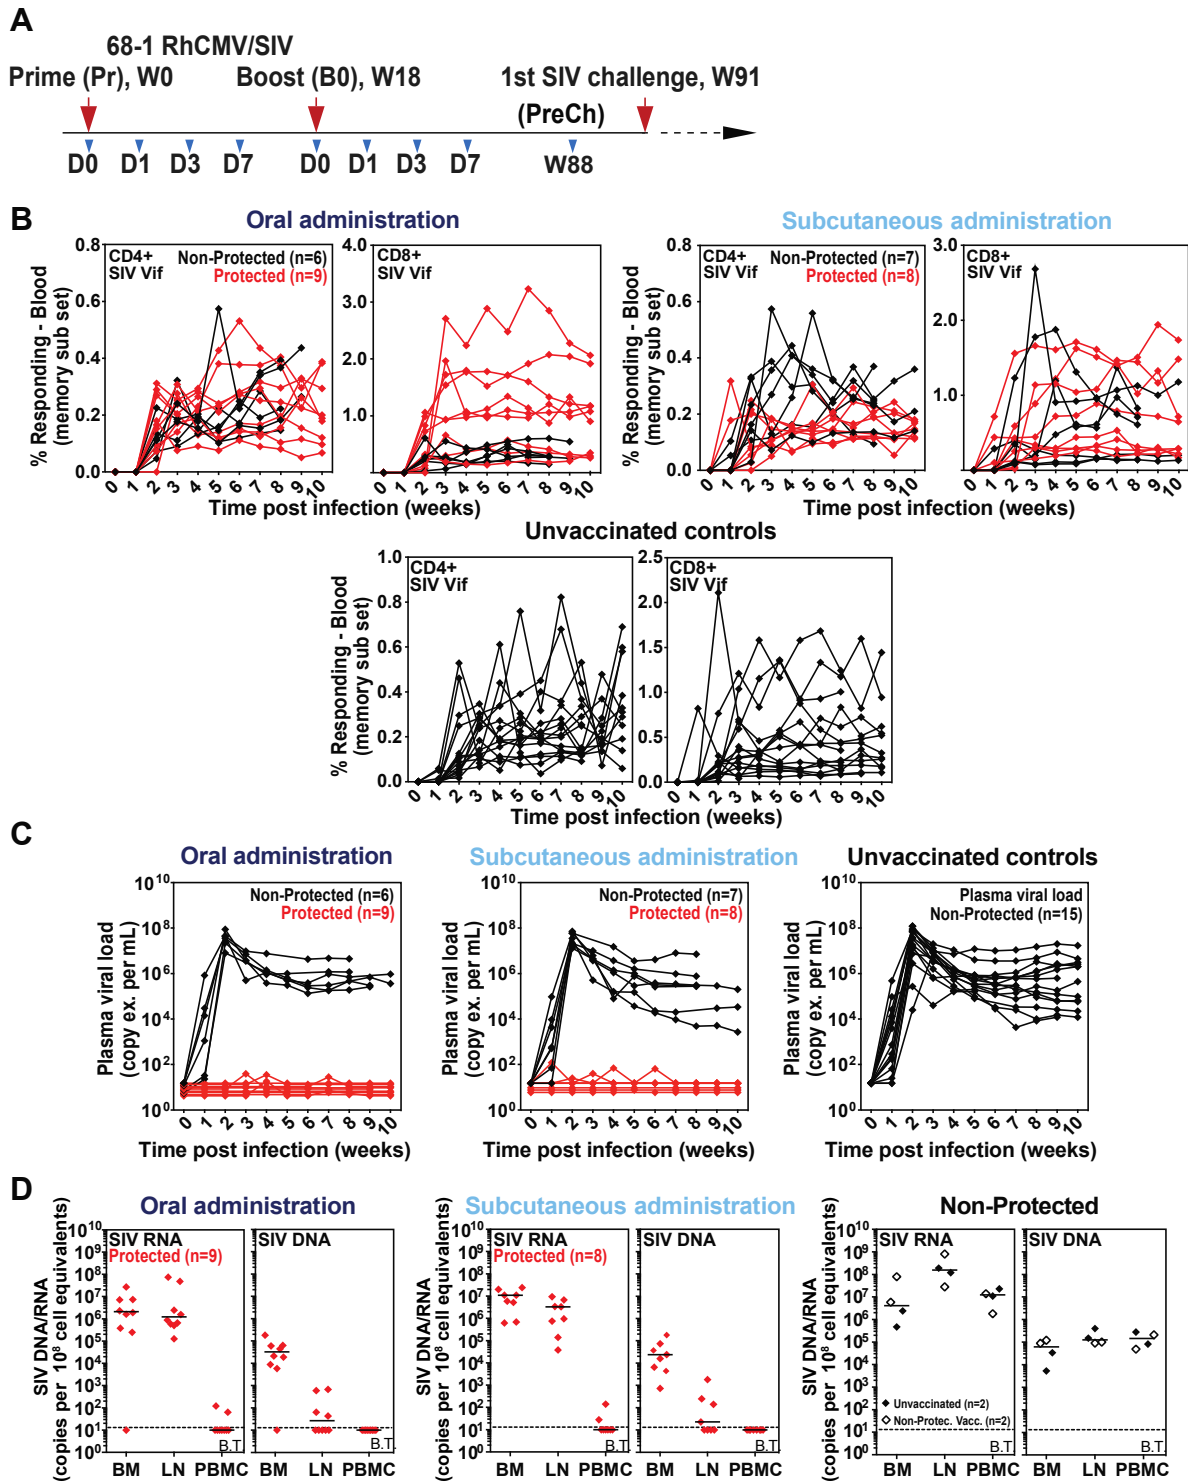

771 **Figure 2**

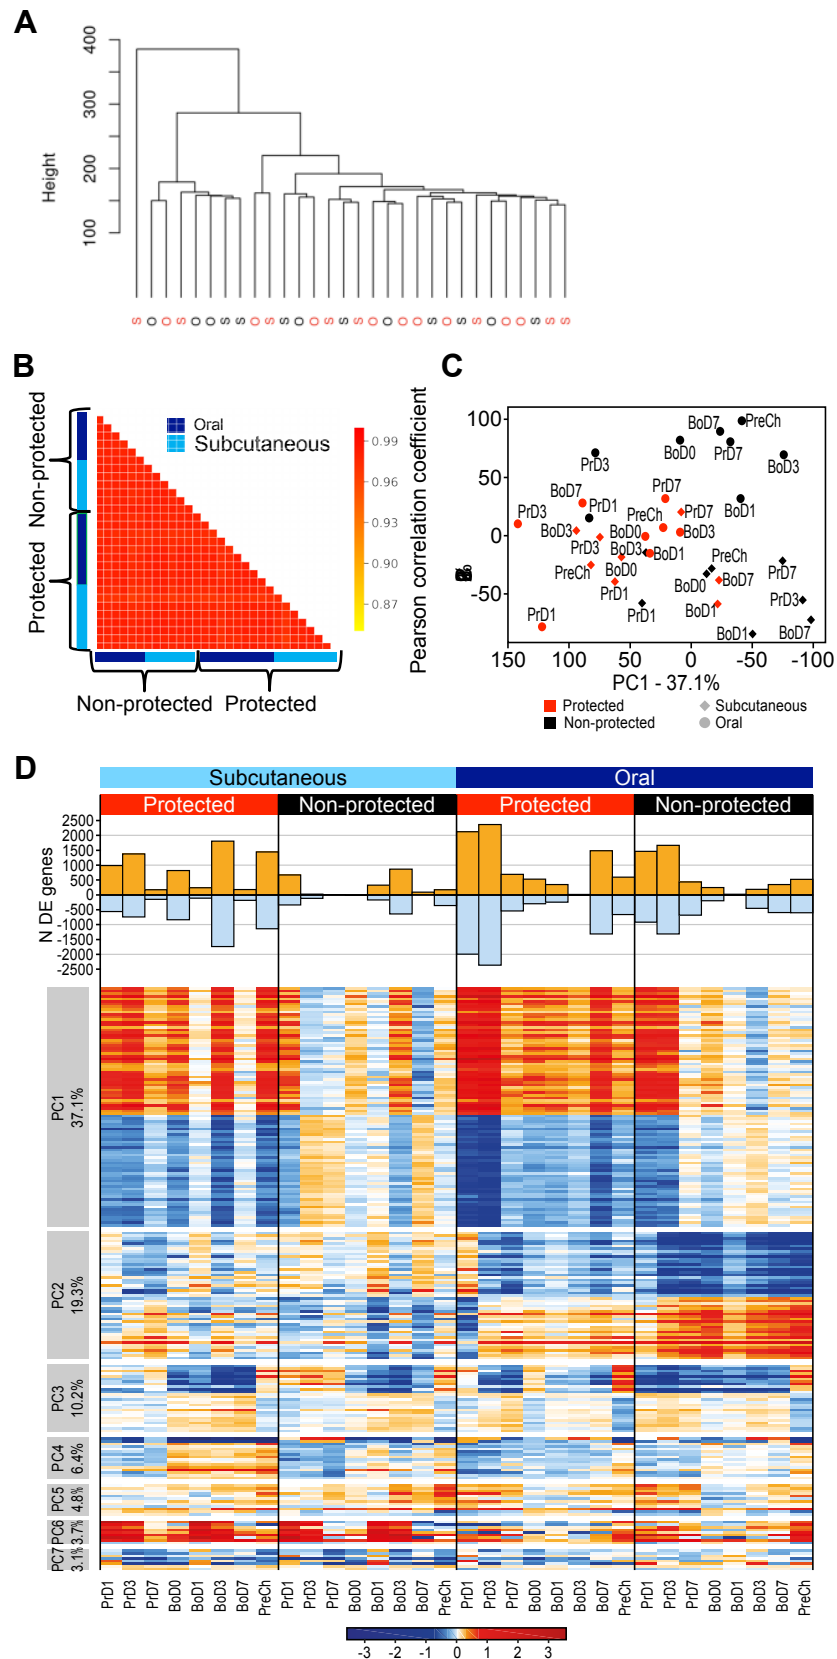

772 **Figure 3**

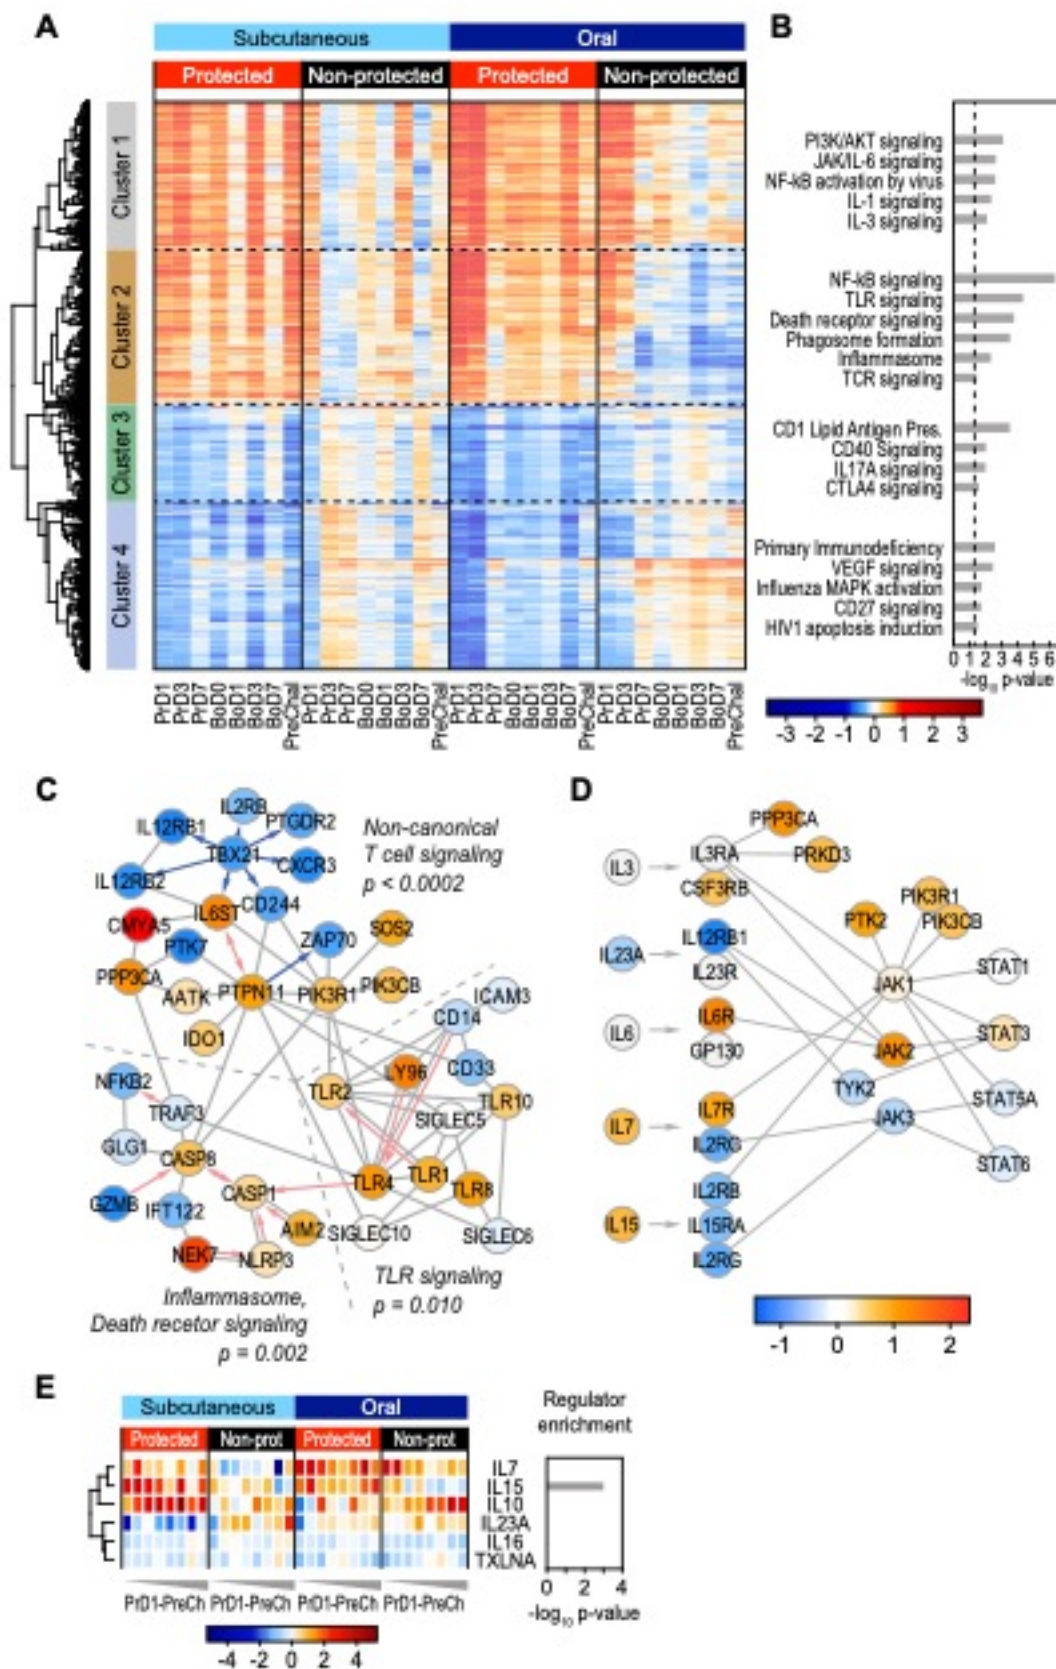

773 **Figure 4**

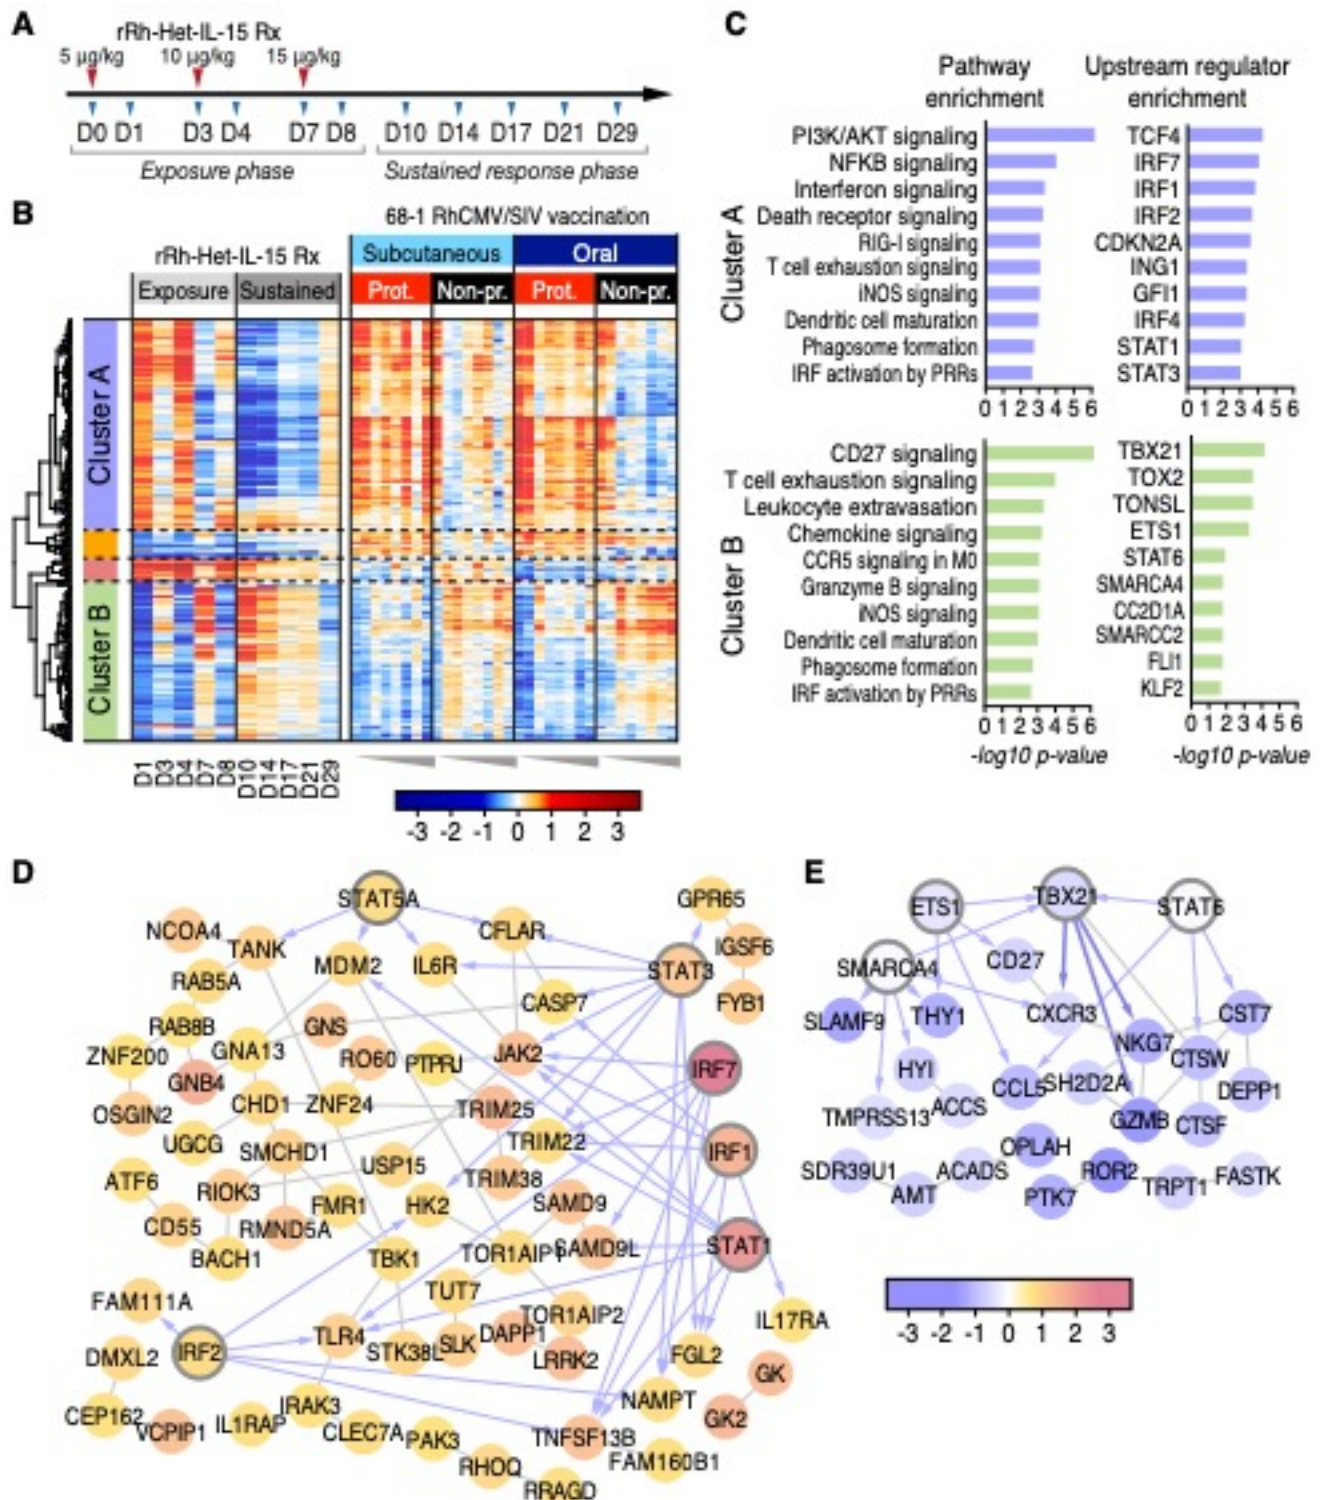

774 **Figure 5**

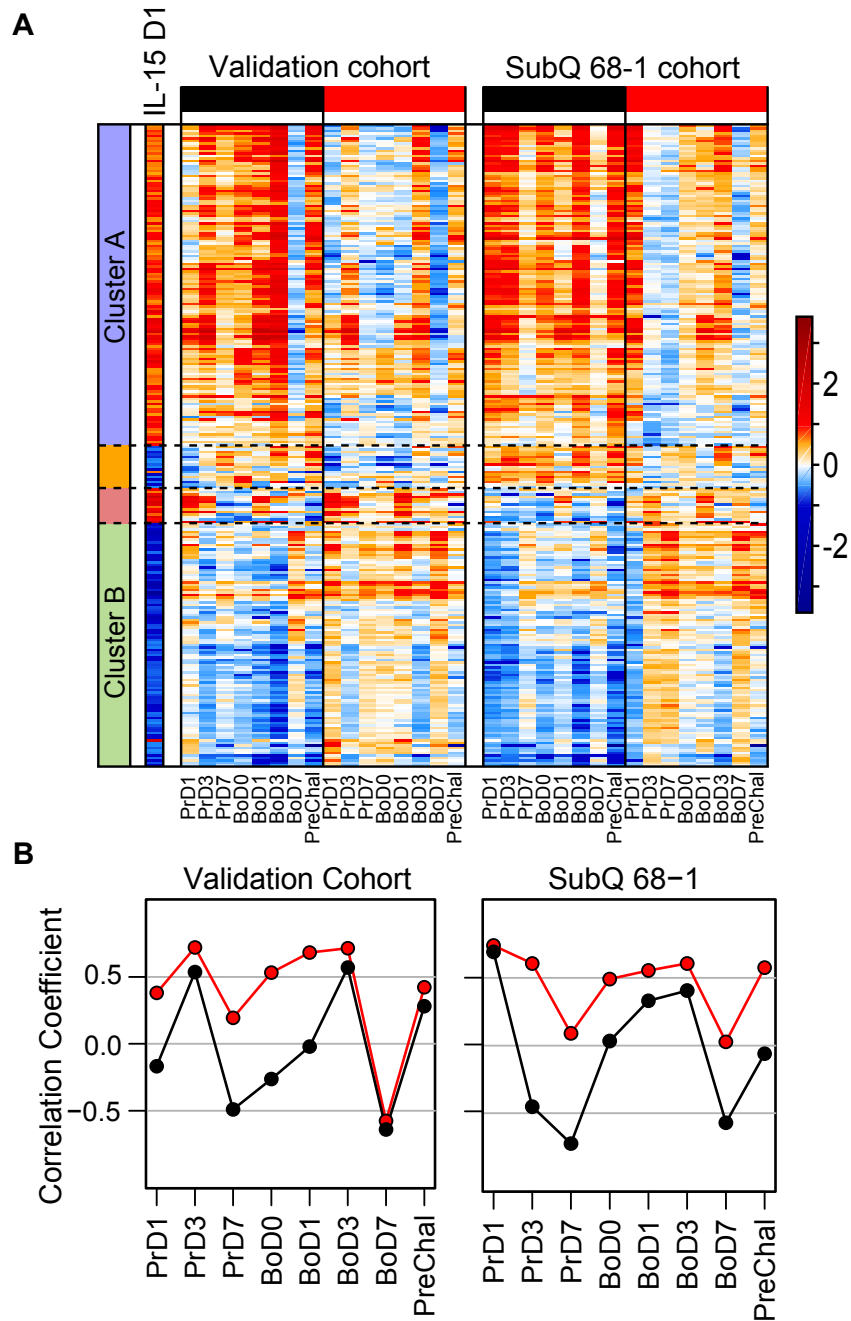

775 **Supporting Information**

776 **Supplemental Tables**

777 Table S1: SubQ and oral cohort fold-changes (from baseline; FC), unadjusted P-values, and adjusted P-  
778 values of DE genes of 68-1 oral and subQ cohort RMs vaccinated with RhCMV/SIV.

779 Table S2: Estimates of differences in DE across protection groups for DDE genes of 68-1 oral and subQ  
780 cohort RMs vaccinated with RhCMV/SIV, with unadjusted and adjusted P-values.

781 Table S3: SubQ and oral cohort fold-changes (from baseline), unadjusted P-values, and adjusted P-  
782 values of IL-15 response genes for all ds (Sheet 1) and 1d after rRh-Het-IL-15 administration (Sheet 2).

783 Table S4: SubQ and oral cohort fold-changes (from baseline), unadjusted P-values, and adjusted P-  
784 values of DDE genes in 68-1 oral and subQ cohort RMs that are also IL-15 response genes.

785 Table S5: Validation cohort fold-changes (from baseline), unadjusted p-values, and adjusted P-values of  
786 validation cohort DE genes.

787 Table S6: Validation cohort fold-changes (from baseline), unadjusted p-values, and adjusted P-values of  
788 DDE genes in 68-1 oral and subQ cohort RMs that are also IL-15 response genes.

789

790 **Supplemental Figures**

791 Figure S1. Immunogenicity of 68-1 RhCMV/SIV vectors in subcutaneously vs. orally vaccinated RM.

792 Figure S2. The magnitude and phenotype of SIV-specific CD4<sup>+</sup> and CD8<sup>+</sup> T cell responses in blood do  
793 not predict 68-1 RhCMV/SIV vector efficacy.



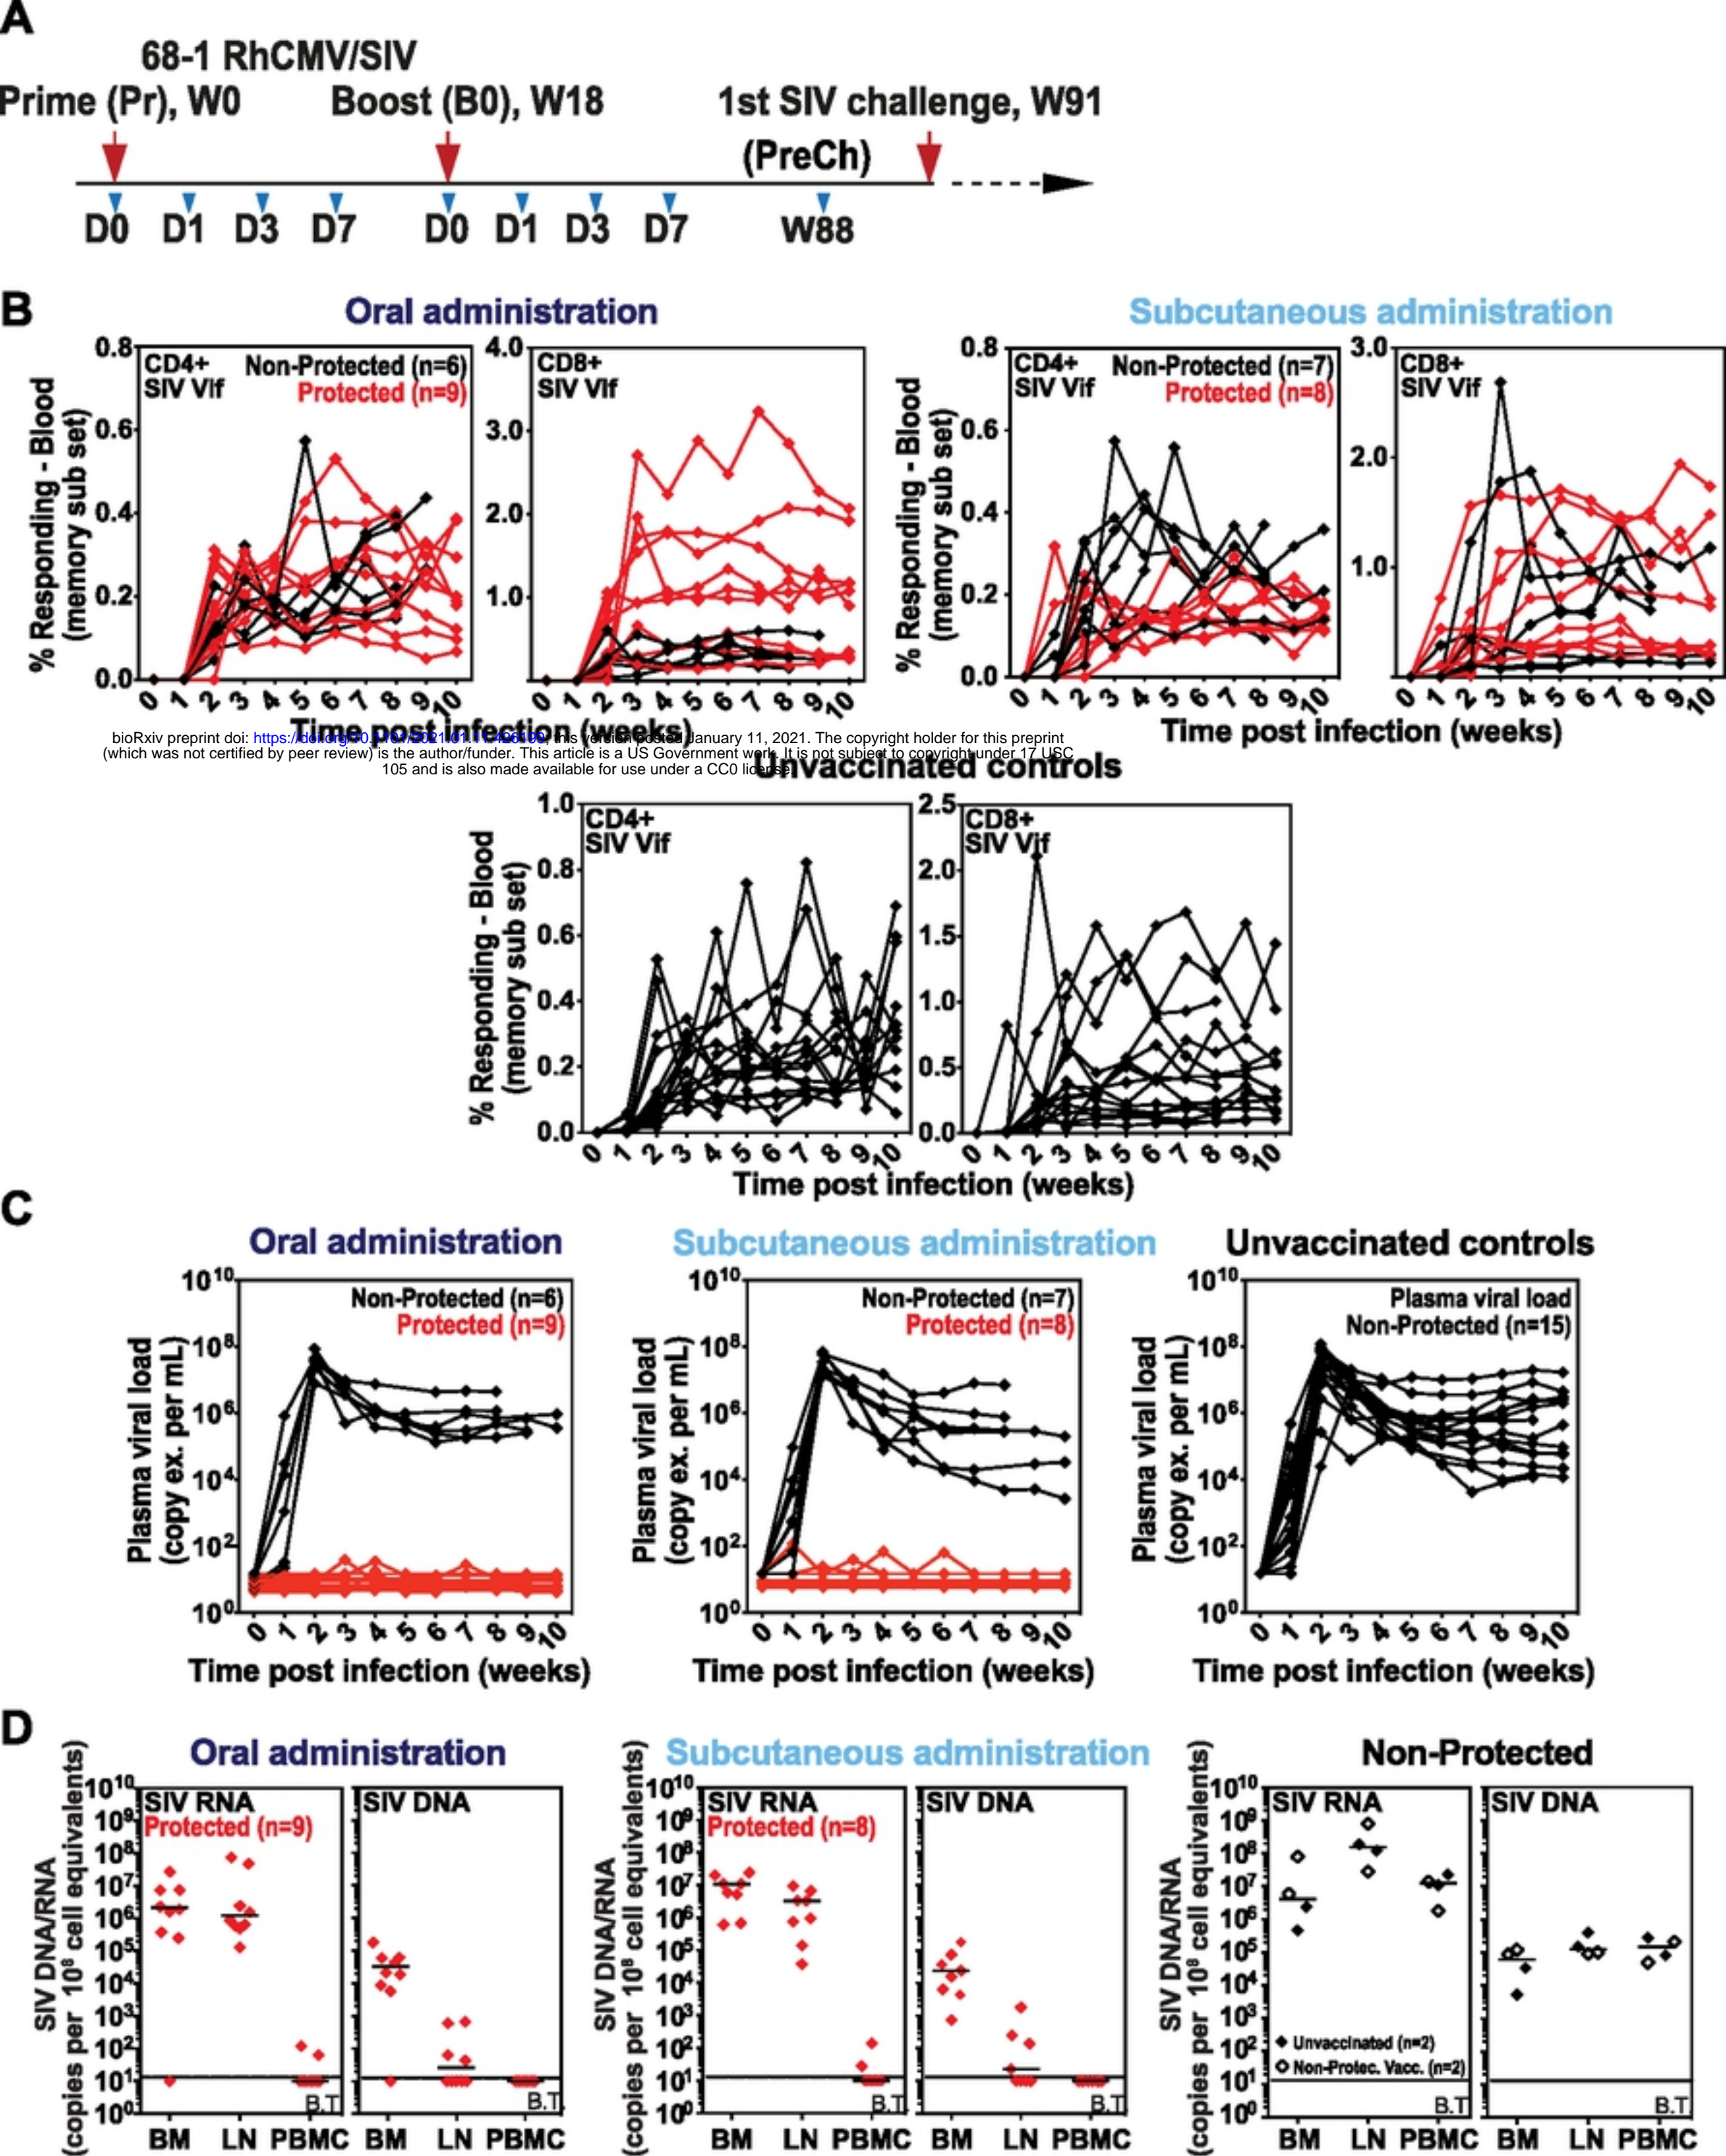

Figure 1

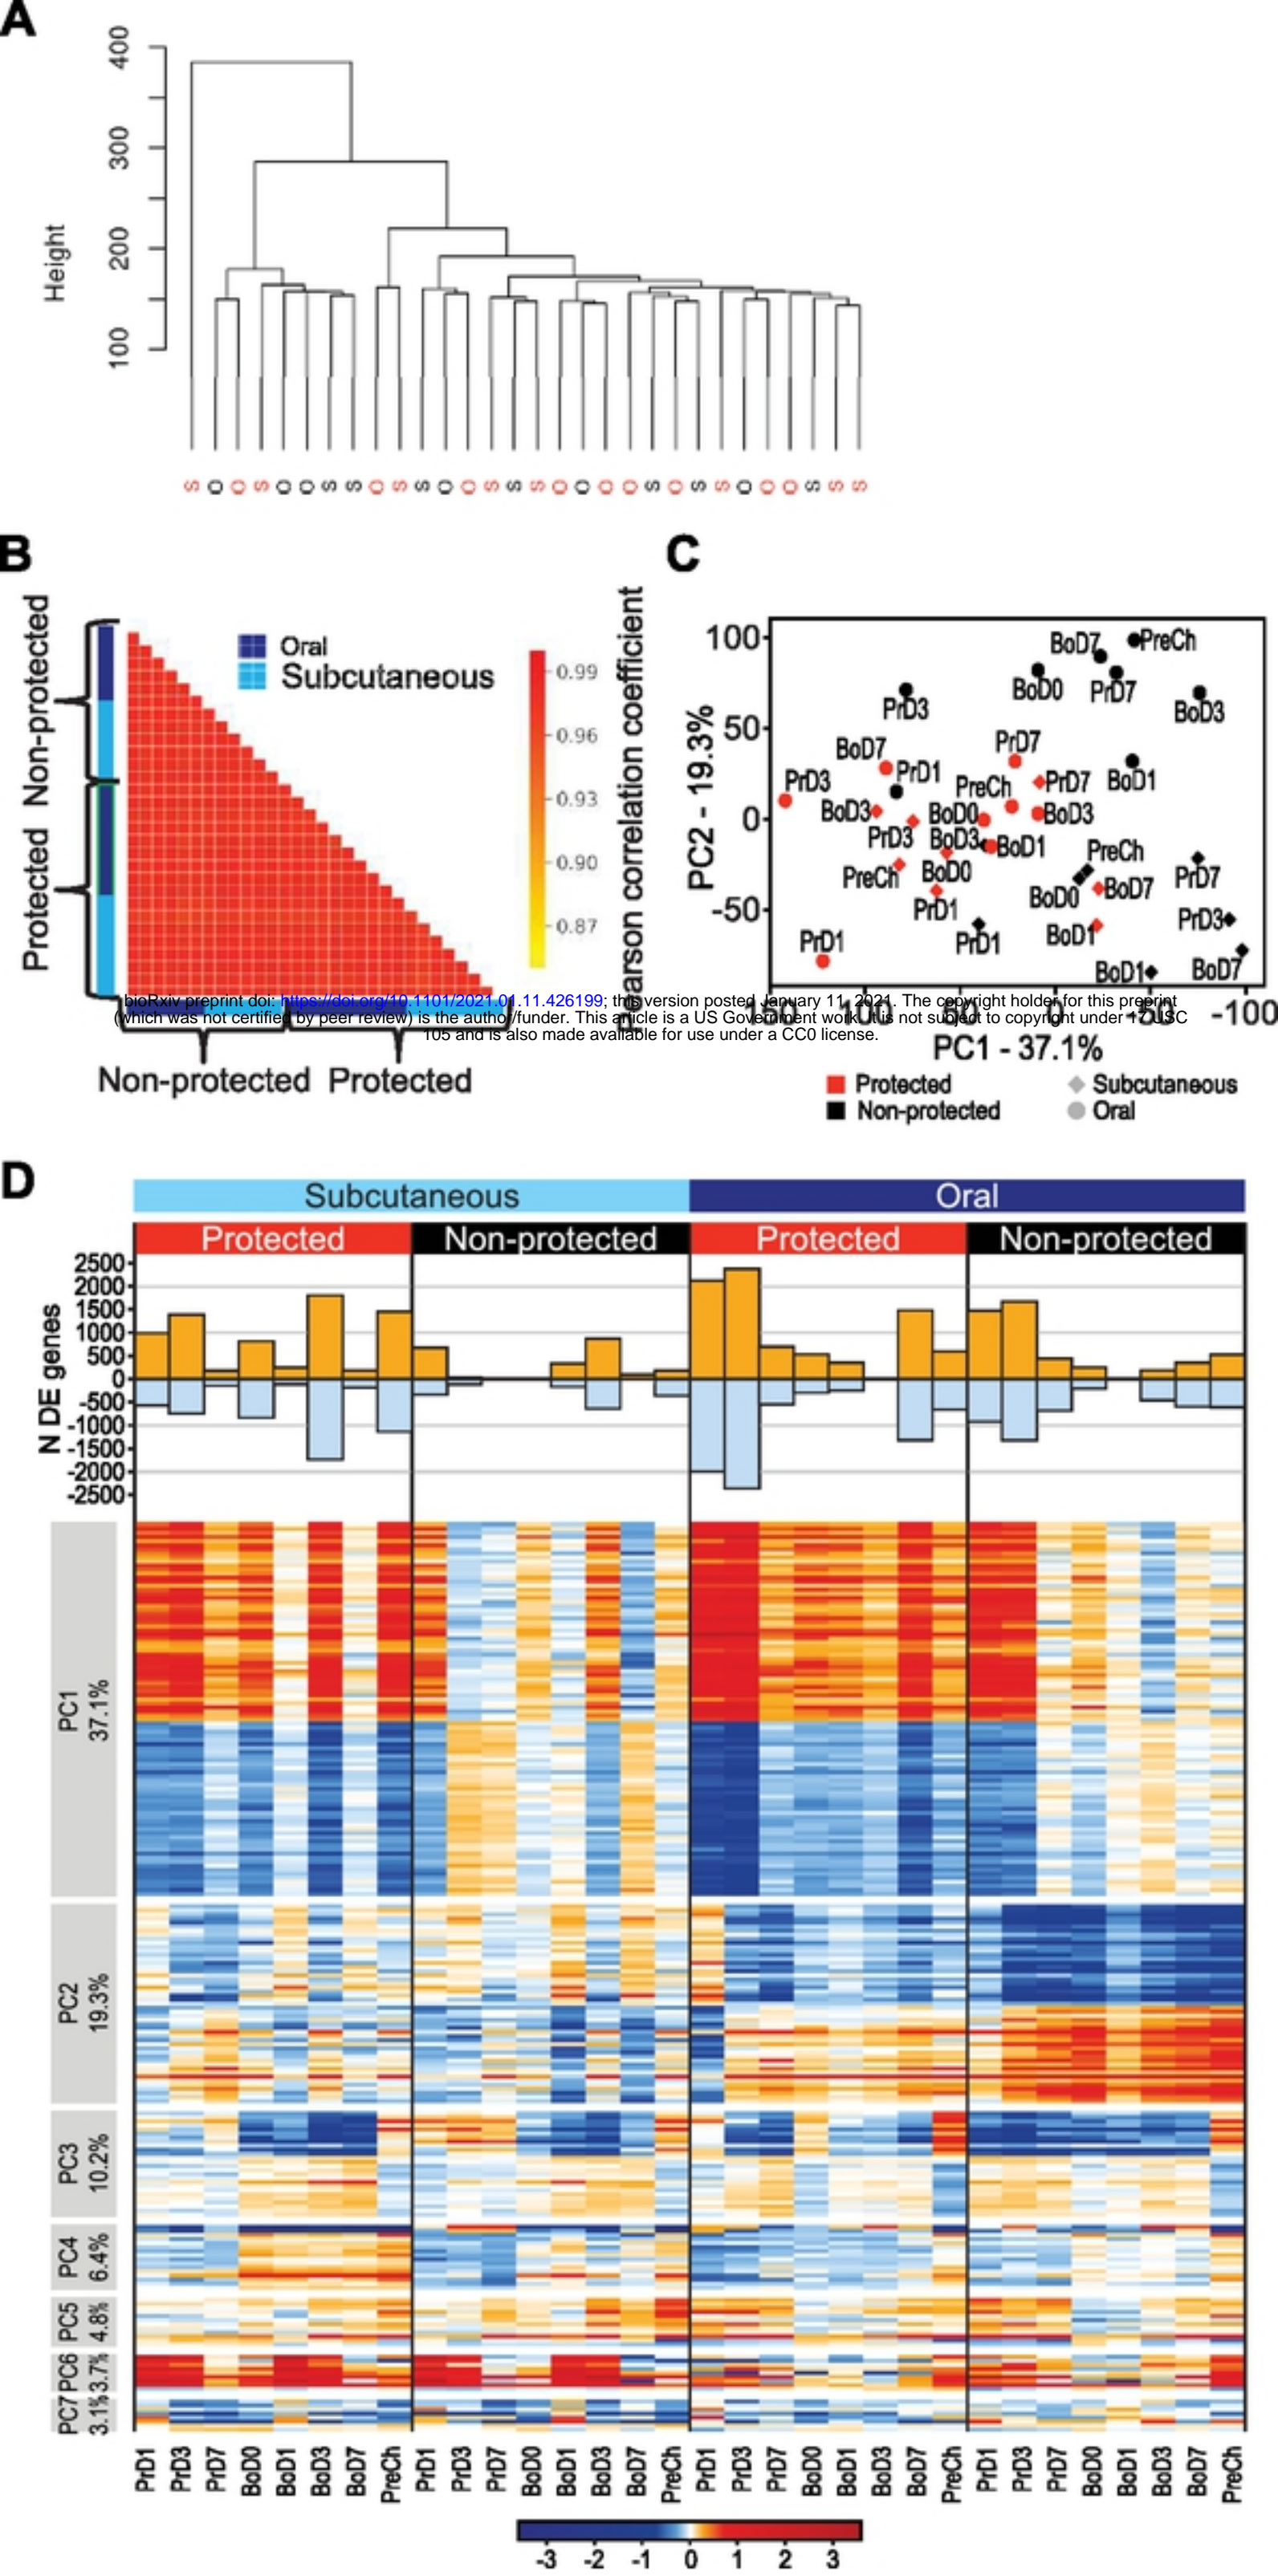

Figure 2

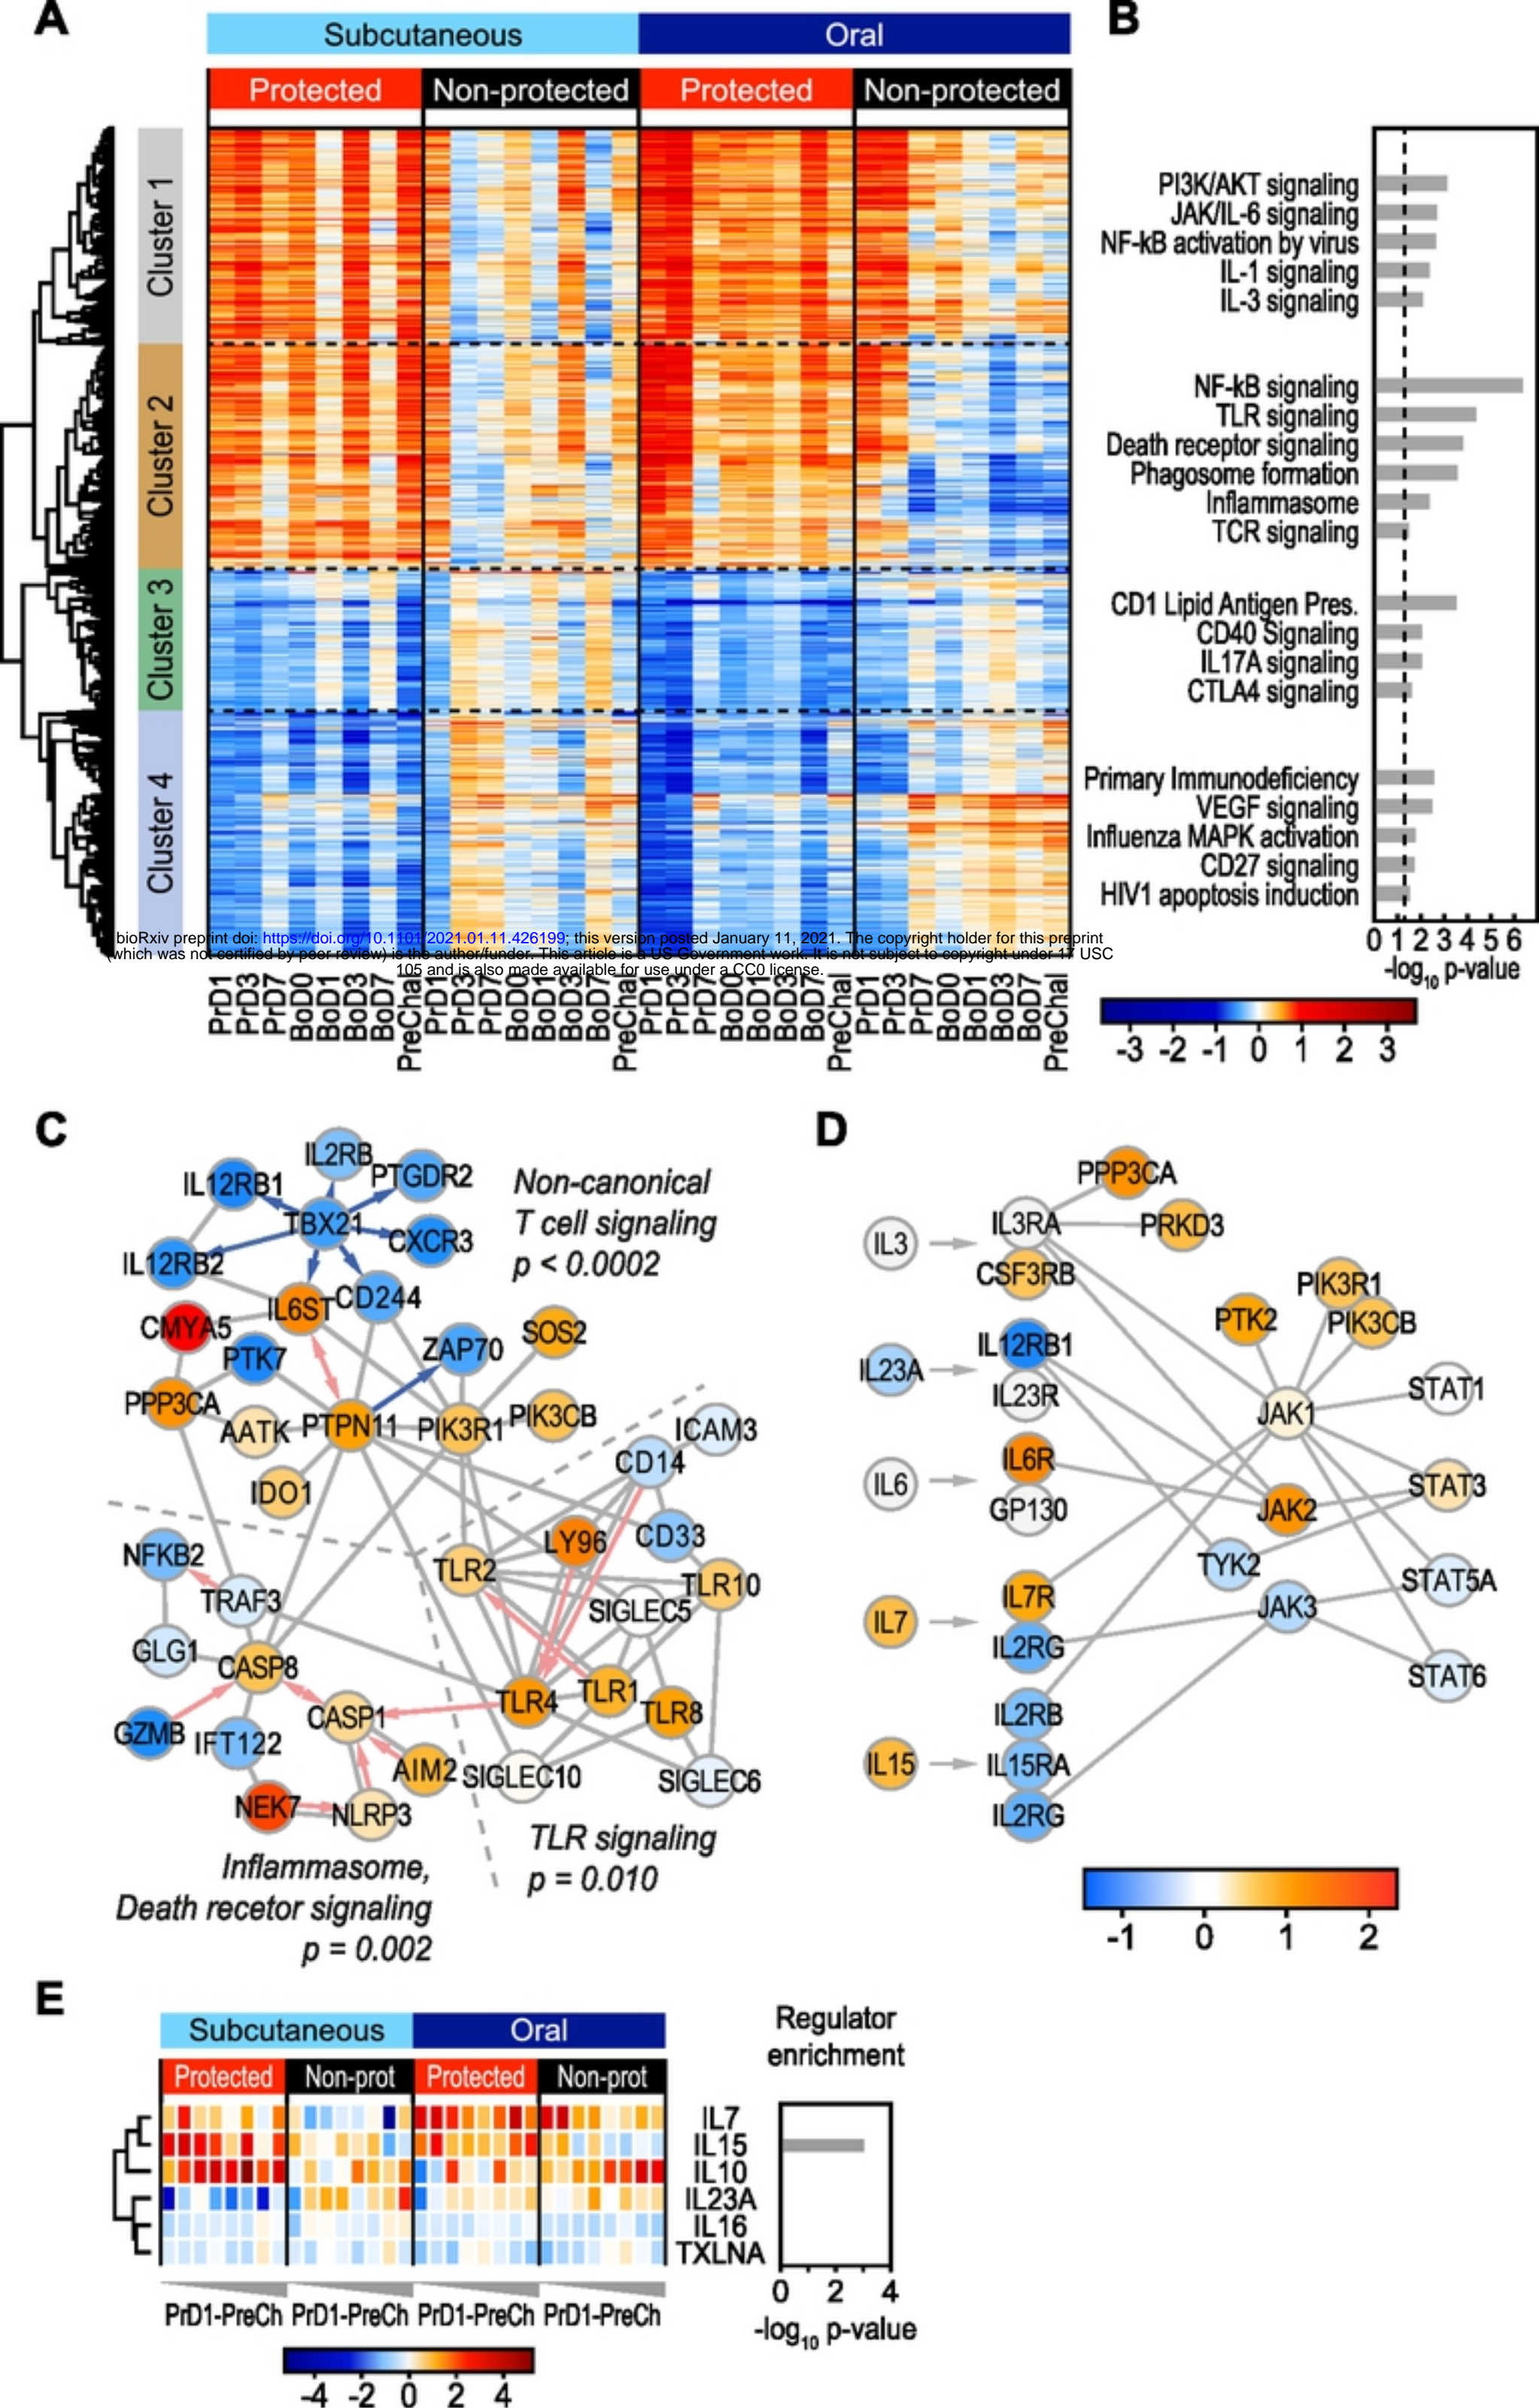

Figure 3

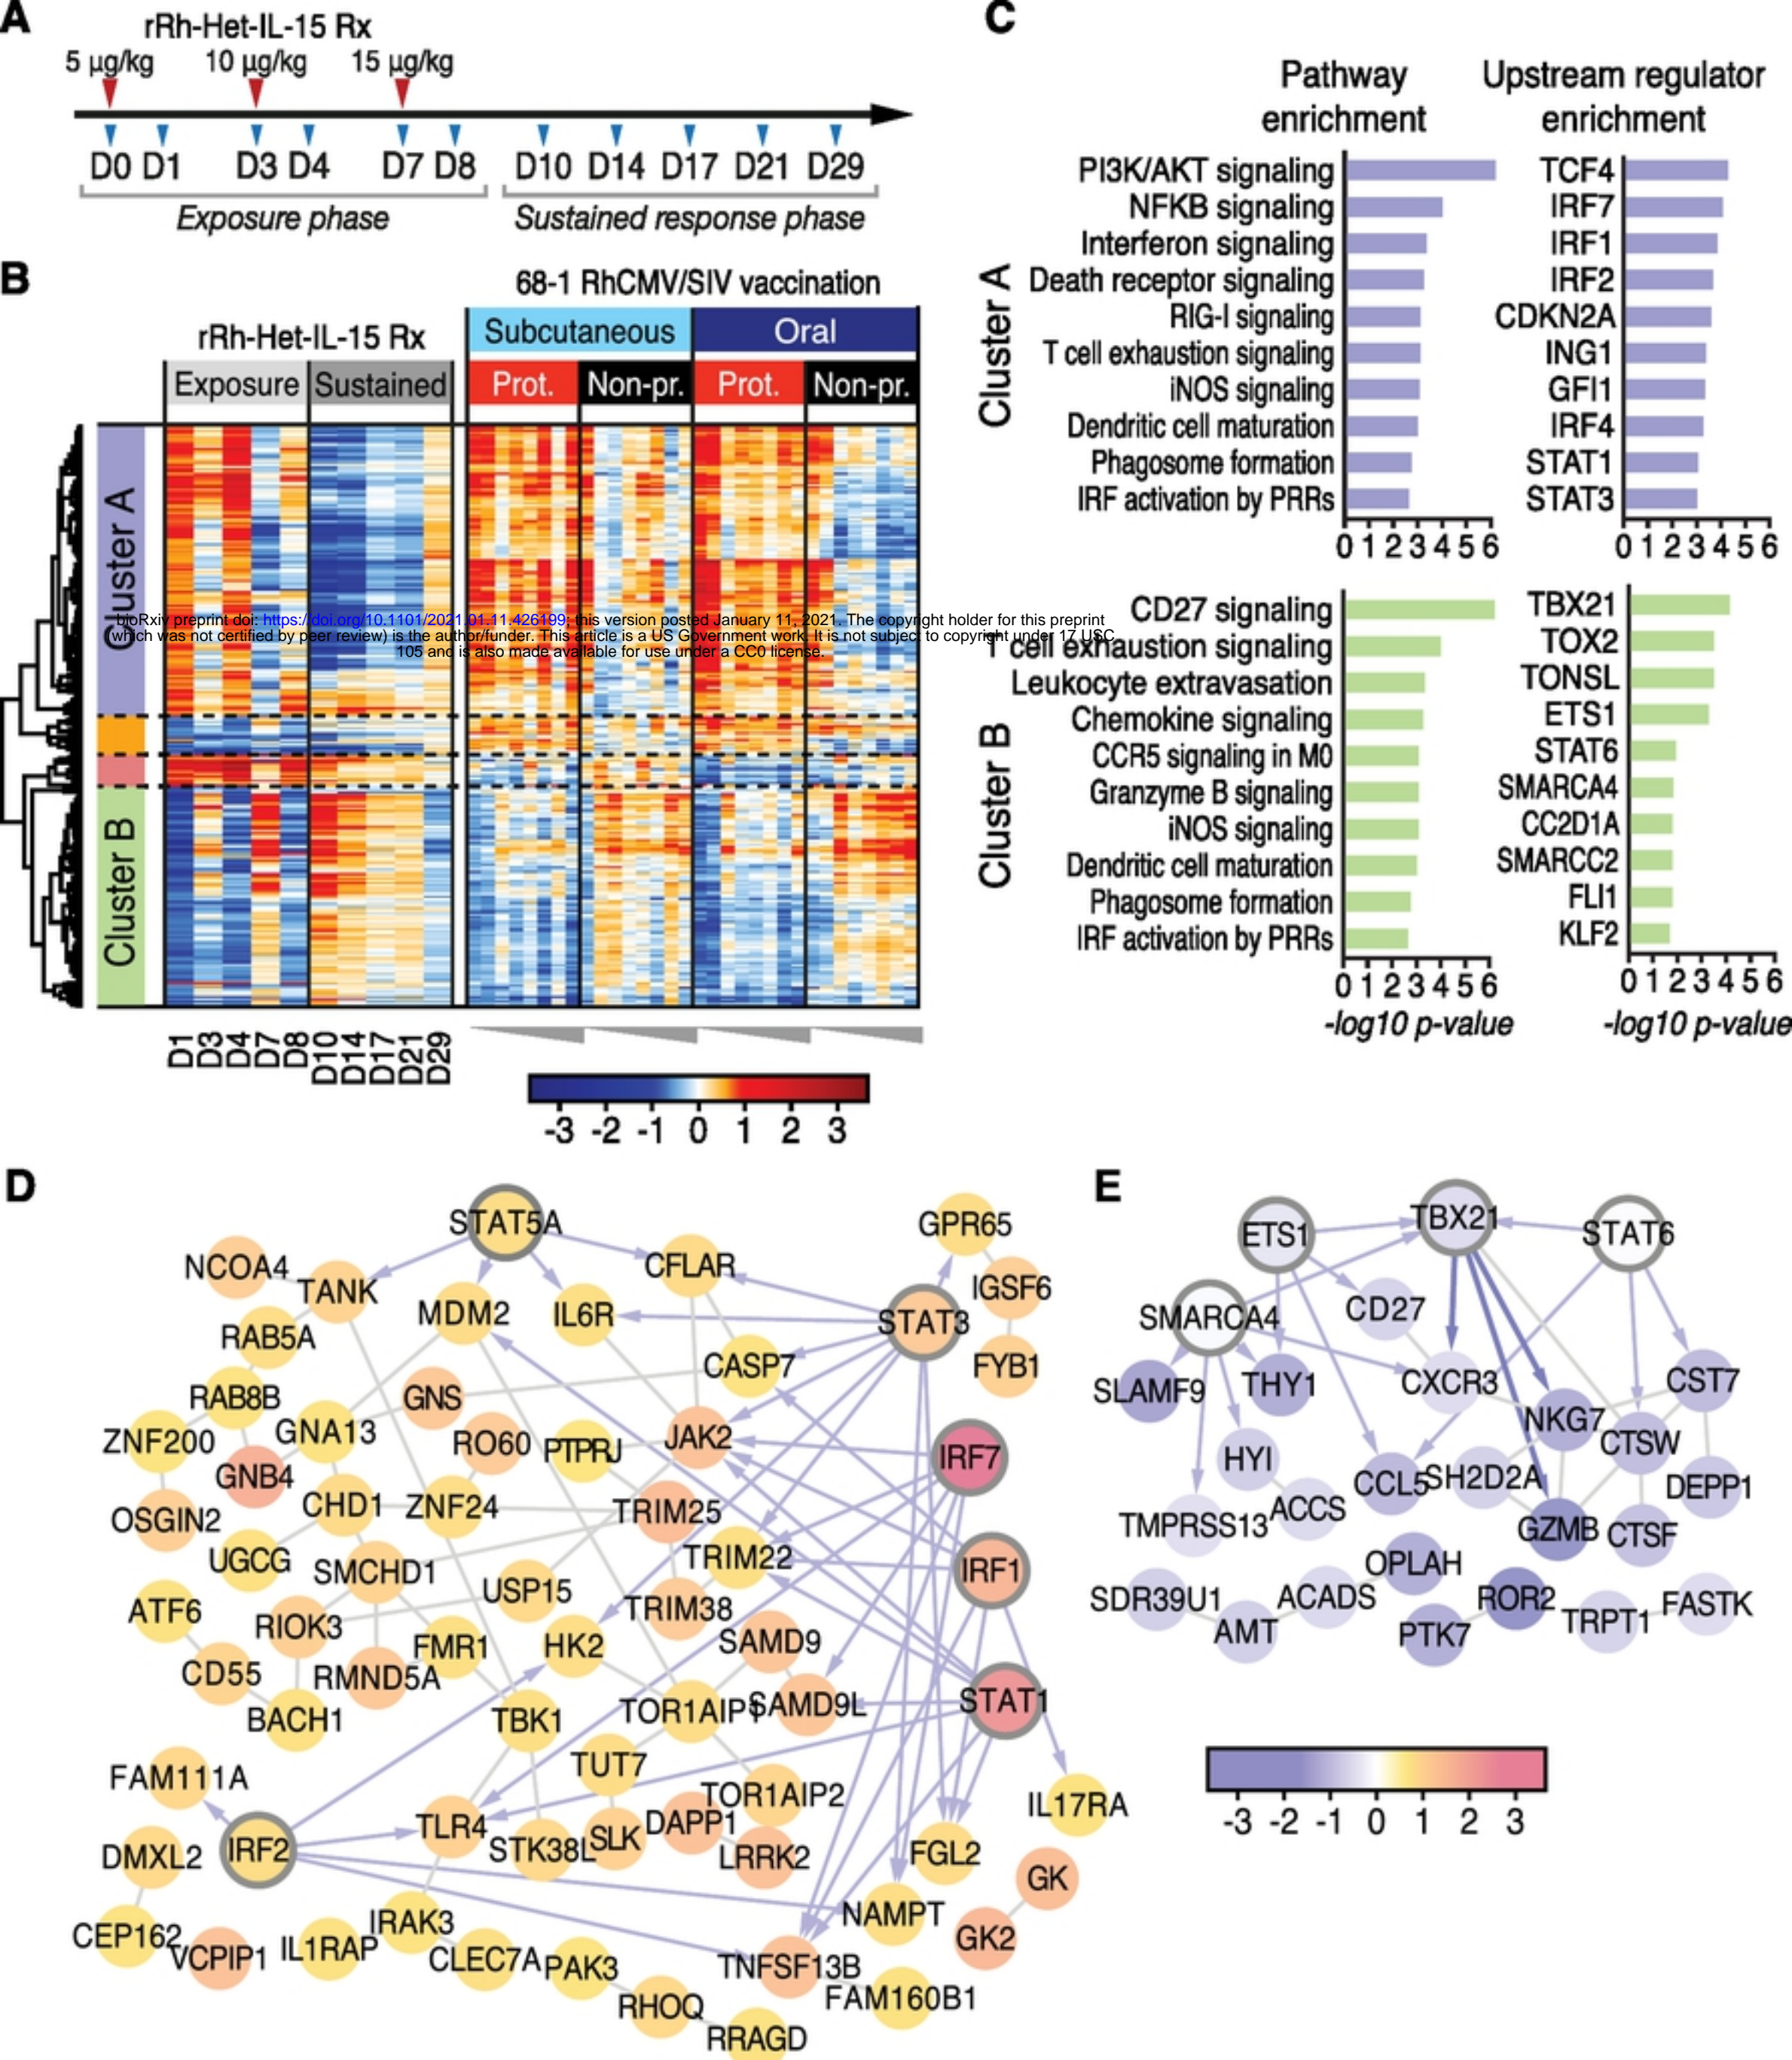

Figure 4

**A**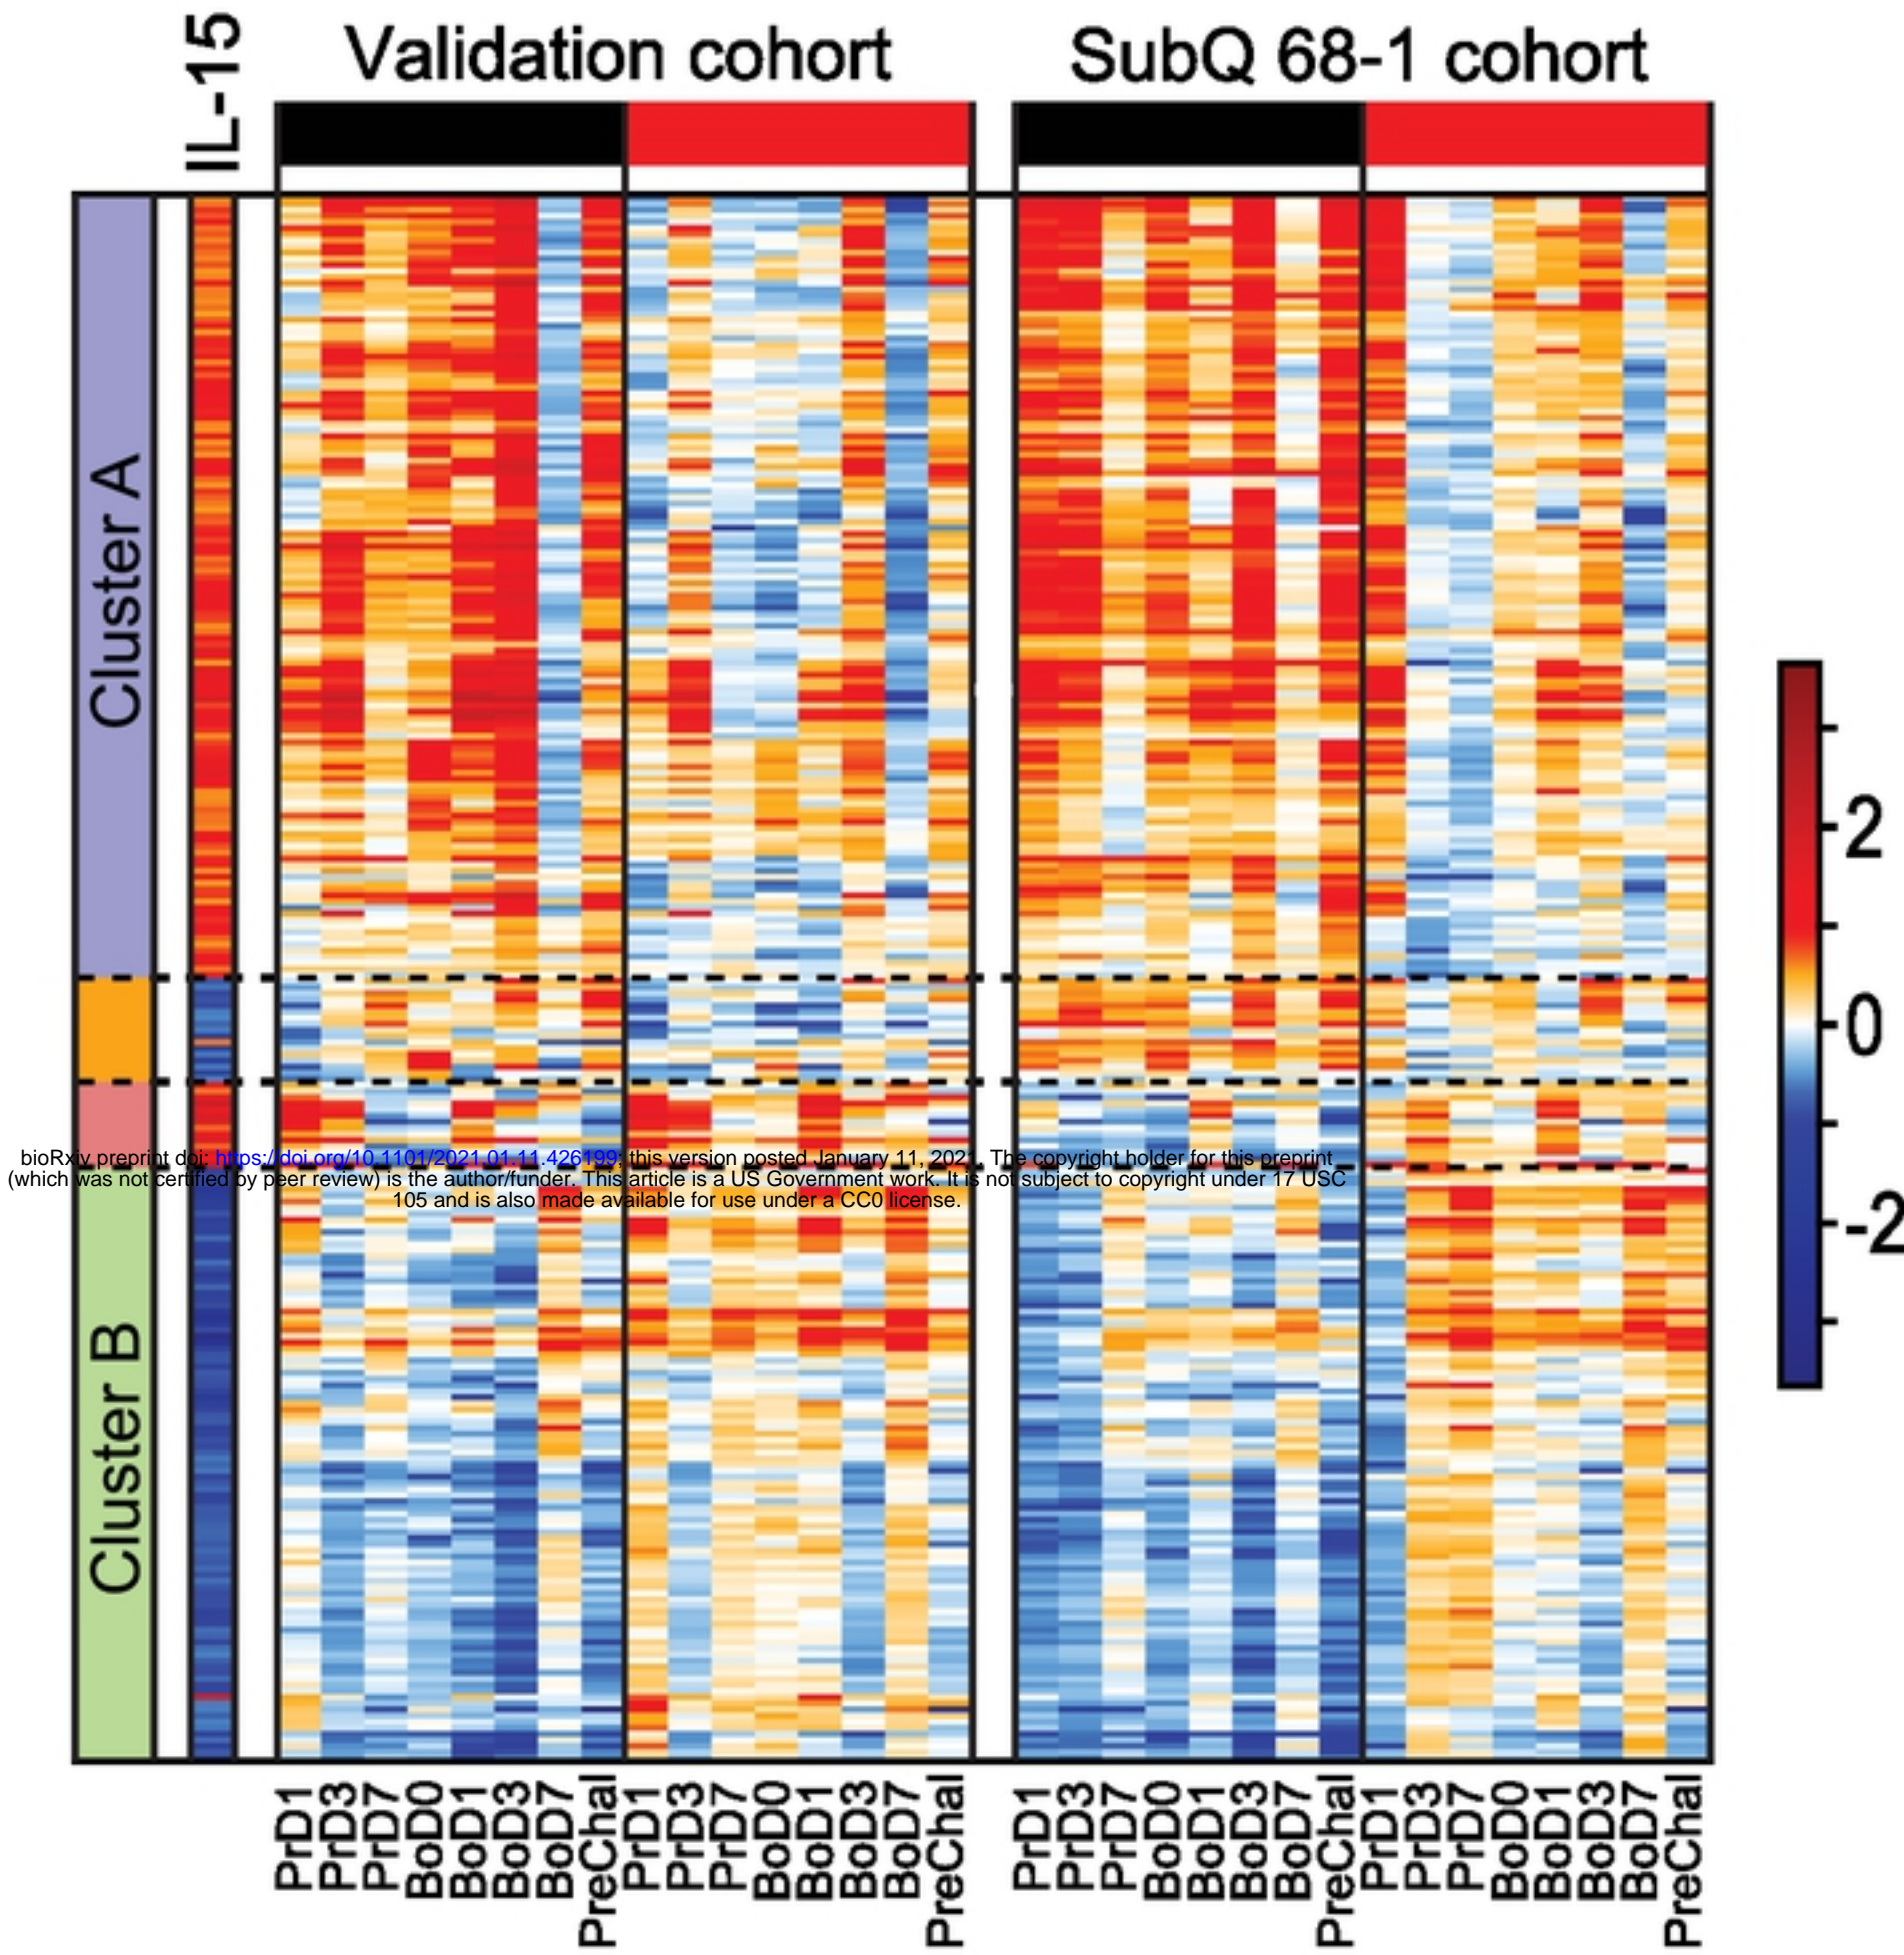**B**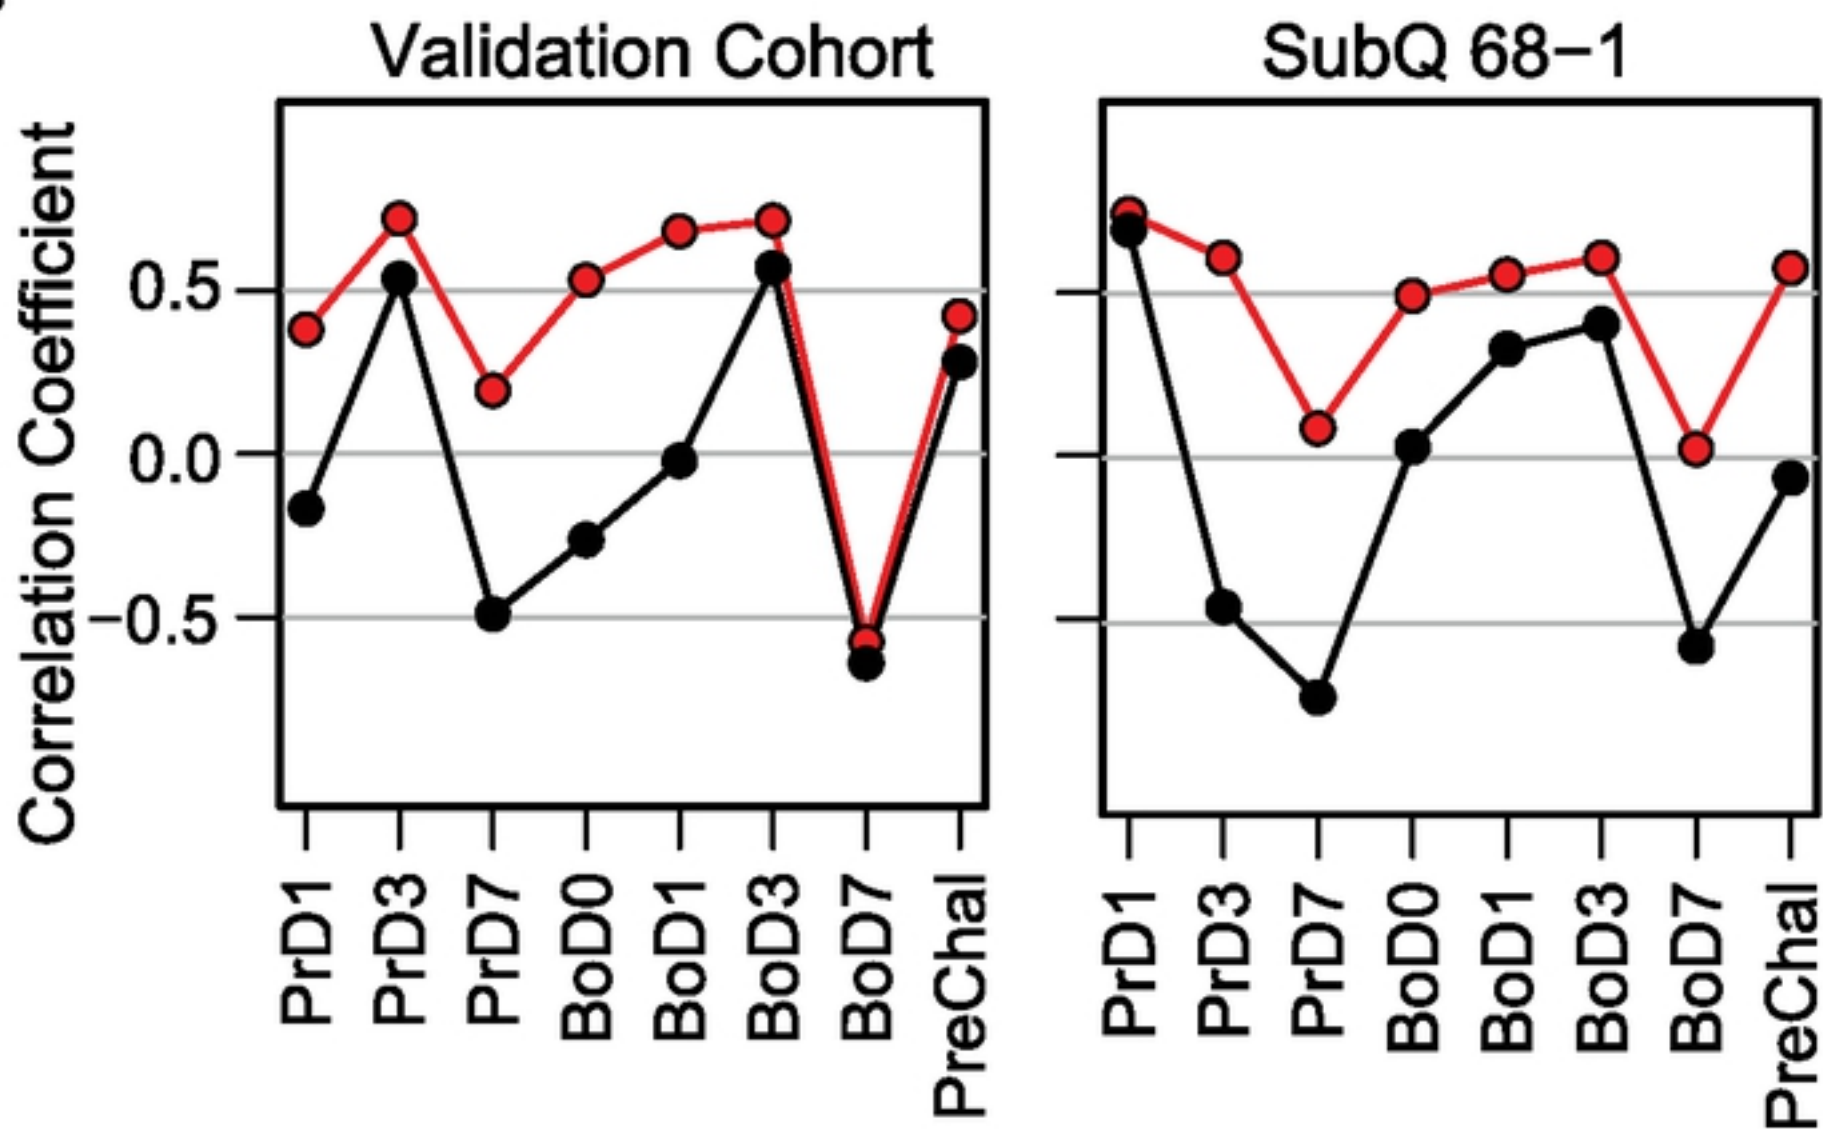

Figure 5
